# Supplementary material for: The codon sequences predict protein lifetimes and other parameters of the protein life cycle in the mouse brain
Source: Sci Rep. 2018 Nov 15;8:16913. doi: 10.1038/s41598-018-35277-8 (PMC6237891; doi:10.1038/s41598-018-35277-8)
Supplement: Supplementary file 2 — Dataset 1 [file 41598_2018_35277_MOESM2_ESM.xlsx]

## Sheet: features
Feature name	Description	Feature category	Feature type	Feature sub-type	Composition feature importances for lifetime prediction	Sequence feature importances for lifetime prediction	Overall feature importances for lifetime prediction	Composition feature importances for protein abundance prediction	Sequence feature importances for for protein abundance prediction	Overall feature importances for protein abundance prediction	Composition feature importances for mRNA abundance prediction	Sequence feature importances for mRNA abundance prediction	Overall feature importances for mRNA abundance prediction	Composition feature importances for translation rate prediction	Sequence feature importances for translation rate prediction	Overall feature importances for translation rate prediction	Composition feature importances for protein length prediction	Sequence feature importances for protein length prediction	Overall feature importances for protein length prediction
X.Ala	percentage of Ala	composition	Amino acids	Asmall hydro AA	5.60828	3.87529	2.15182	3.2447	1.83974	0.79429	1.04293	0.376469	0.264073	1.16285	0.541711	0.429607	0.591016	0.139245	0.14311
X.Arg	percentage of Arg	composition	Amino acids	positive AA	1.29317	0.444613	0.409197	3.12352	1.49034	1.67087	1.28087	0.46835	0.58853	0.827245	0.251456	0.299727	0.526897	0.130347	0.149702
X.Asn	percentage of Asn	composition	Amino acids	negative AA	1.13664	0.228694	0.199435	0.815843	0.278797	0.197388	0.931228	0.282462	0.289304	0.841291	0.268988	0.275379	0.570182	0.129863	0.165306
X.Asp	percentage of Asp	composition	Amino acids	negative AA	2.81715	0.961202	0.56863	1.04258	0.409008	0.270726	1.32588	0.476365	0.289262	0.95652	0.306757	0.7448	0.704829	0.150935	0.182153
X.Cys	percentage of Cys	composition	Amino acids	PothersAA	0.904508	0.348623	0.260848	0.857874	0.478001	0.234426	0.839854	0.248837	0.207281	0.667406	0.202875	0.239883	0.579274	0.129467	0.141484
X.Gln	percentage of Gln	composition	Amino acids	negative AA	1.92644	0.761396	0.62259	1.61599	0.678238	0.554094	1.0457	0.339823	0.292735	1.06326	0.464817	0.472034	1.05065	0.424974	0.431638
X.Glu	percentage of Glu	composition	Amino acids	negative AA	2.33357	0.50183	0.384513	1.00289	0.443875	0.346797	0.937345	0.307266	0.228306	1.07735	0.399942	0.525293	0.667274	0.203514	0.286186
X.Gly	percentage of Gly	composition	Amino acids	others	1.19316	0.341775	0.258469	1.39949	0.46502	0.239502	1.0305	0.271201	0.324964	0.84039	0.362556	0.264745	0.600741	0.192176	0.529836
X.His	percentage of His	composition	Amino acids	PothersAA	0.885026	0.328675	0.197838	1.35984	0.702296	0.491786	0.883036	0.404609	0.227527	0.876674	0.324575	0.25911	0.831198	0.138219	0.156912
X.Ile	percentage of Ile	composition	Amino acids	small hydro AA	1.21656	0.416705	0.28328	1.60399	1.35162	0.529784	1.1723	0.366869	0.231083	0.756369	0.206934	0.28474	0.447978	0.113942	0.118046
X.Leu	percentage of Leu	composition	Amino acids	Lsmall hydro AA	0.900025	0.338166	0.267312	3.24949	1.44491	1.00145	1.21119	0.427852	0.280351	0.69071	0.219487	0.189568	0.495893	0.138203	0.174769
X.Lys	percentage of Lys	composition	Amino acids	positive AA	1.30063	0.328166	0.338928	1.64807	0.602495	0.557708	1.42619	0.632501	0.943774	0.83099	0.344208	0.383945	0.852073	0.219828	0.362075
X.Met	percentage of Met	composition	Amino acids	others	0.87255	0.328947	0.189521	0.939562	0.234827	0.220661	1.13472	0.419399	0.260145	1.74831	0.561034	0.421914	0.636831	0.159453	0.152612
X.Phe	percentage of Phe	composition	Amino acids	others	1.48503	0.428359	0.383992	0.871459	0.376494	0.299164	1.17388	0.453644	0.380562	1.1664	0.365451	0.886201	0.567876	0.227584	0.221545
X.Pro	percentage of Pro	composition	Amino acids	PothersAA	0.889319	0.241461	0.154585	1.01056	0.299175	0.253561	0.872895	0.329132	0.25011	0.978966	0.308957	0.397316	0.747688	0.163111	0.176711
X.Ser	percentage of Ser	composition	Amino acids	phosphor AA	1.23053	0.300345	0.225094	2.15708	0.719532	0.240596	0.902375	0.253197	0.326163	2.8502	1.94249	1.71407	1.57801	0.782141	0.653988
X.Thr	percentage of Thr	composition	Amino acids	phosphor AA	1.20354	0.326847	0.221097	1.03399	0.281067	0.335281	0.955154	0.315147	0.329207	0.888417	0.338837	0.32748	0.897419	0.187624	0.32171
X.Trp	percentage of Trp	composition	Amino acids	PothersAA	0.980299	0.261265	0.212371	0.907346	0.297715	0.292686	0.834778	0.255447	0.194891	1.37479	0.359602	0.405021	1.37243	0.236642	0.230611
X.Tyr	percentage of Tyr	composition	Amino acids	others	1.00448	0.290667	0.200161	0.864174	0.240754	0.229752	1.07703	0.356869	0.240075	0.983616	0.312128	0.472094	0.615055	0.218252	0.200947
X.Val	percentage of Val	composition	Amino acids	small hydro AA	1.91641	0.462928	0.33014	0.97302	0.360674	0.256032	1.02607	0.298189	0.186491	1.71767	0.688753	0.560834	0.659882	0.156459	0.188814
AAA - Lysine	Percentage of Codon AAA	composition	Codons	positive COD	0.928439	0.504834	0.397022	1.122	0.33215	0.214512	4.09932	2.4019	3.9914	0.74957	0.207335	0.156988	0.536741	0.124751	0.171642
AAC - Asparagine	Percentage of Codon AAC	composition	Codons	negative COD	1.06569	0.308259	0.301774	0.997287	0.231523	0.203746	1.12882	0.37162	0.286423	0.761542	0.258814	0.243465	0.605873	0.143021	0.159314
AAG - Lysine	Percentage of Codon AAG	composition	Codons	positive COD	1.07305	0.305684	0.339221	2.70408	0.959751	0.631916	1.4858	0.730695	0.694919	0.996848	0.564091	0.874846	0.9302	0.286762	0.282038
AAU - Asparagine	Percentage of Codon AAU	composition	Codons	negative COD	1.18726	0.34674	0.422684	0.694666	0.235122	0.262814	1.24067	0.53428	0.684716	0.862796	0.363302	0.25986	0.560401	0.177076	0.140873
ACA - Threonine	Percentage of Codon ACA	composition	Codons	phosphor COD	0.799535	0.22751	0.204903	0.973195	0.21266	0.234655	0.958455	0.394004	0.372528	1.69704	0.783798	0.407672	1.4464	0.419052	0.324257
ACC - Threonine	Percentage of Codon ACC	composition	Codons	phosphor COD	2.107	0.777998	0.561034	1.25891	0.514986	0.416978	1.58826	0.718394	1.47698	0.793163	0.205494	0.253943	0.64659	0.140809	0.14007
ACG - Threonine	Percentage of Codon ACG	composition	Codons	phosphor COD	1.35701	0.415581	0.255412	0.938739	0.258755	0.234643	0.948938	0.320158	0.254376	1.98851	1.15671	0.73891	3.9754	1.77114	0.520533
ACU - Threonine	Percentage of Codon ACU	composition	Codons	phosphor COD	0.916281	0.347404	0.195877	0.939754	0.267619	0.207367	1.0594	0.358665	0.372935	0.986257	0.28606	0.252544	1.44361	0.319434	0.367559
AGA - Arginine	Percentage of Codon AGA	composition	Codons	positive COD	0.622834	0.302243	0.183588	1.52409	0.84587	0.399592	2.95569	1.46448	1.7445	1.49844	0.414252	0.336097	0.763976	0.147033	0.187334
AGC - Serine	Percentage of Codon AGC	composition	Codons	phosphor COD	1.10503	0.256967	0.156527	1.29023	0.422691	0.166967	1.20203	0.412542	0.369384	1.3268	0.345845	0.259956	0.764167	0.224015	0.201912
AGG - Arginine	Percentage of Codon AGG	composition	Codons	positive COD	1.02056	0.309598	0.215509	1.44258	0.43868	0.458733	1.33847	0.496973	0.588539	1.42323	0.61936	0.54012	0.802075	0.176557	0.205013
AGU - Serine	Percentage of Codon AGU	composition	Codons	phosphor COD	0.953942	0.307548	0.190454	2.29058	0.800041	0.61003	0.846994	0.276828	0.29642	3.13117	2.33777	1.32763	2.39829	1.30444	0.695667
AUA - Isoleucine	Percentage of Codon AUA	composition	Codons	small hydro COD	0.943119	0.200626	0.187286	0.69874	0.344202	0.278792	3.30896	1.78248	2.02881	1.45908	0.531112	0.449463	1.49597	0.174188	0.15272
AUC - Isoleucine	Percentage of Codon AUC	composition	Codons	small hydro COD	1.42323	0.502436	0.257843	1.17904	0.943808	0.581314	1.35688	0.515726	0.479205	0.825905	0.247267	0.171192	0.492584	0.109199	0.0891639
AUG - Methionine	Percentage of Codon AUG	composition	Codons	others	0.860525	0.320563	0.240707	0.912582	0.212971	0.222203	1.22279	0.43688	0.322493	1.71532	0.50311	0.453355	0.635001	0.15715	0.122626
AUU - Isoleucine	Percentage of Codon AUU	composition	Codons	small hydro COD	0.884236	0.331656	0.177059	0.938236	0.247052	0.262741	1.24368	0.361631	0.333786	0.792443	0.206374	0.191884	0.520769	0.107371	0.112937
CAA - Glutamine	Percentage of Codon CAA	composition	Codons	negative COD	1.42658	0.565696	0.318972	1.00934	0.404387	0.440232	1.59832	0.680385	0.401147	1.11134	0.57006	0.389845	1.17973	0.262825	0.275489
CAC - Histidine	Percentage of Codon CAC	composition	Codons	PothersCOD	0.952188	0.253396	0.185776	0.98579	0.30022	0.236569	1.03005	0.349118	0.224682	0.771952	0.280154	0.217968	0.91575	0.190899	0.159938
CAG - Glutamine	Percentage of Codon CAG	composition	Codons	negative COD	1.16794	0.399149	0.332877	1.12688	0.386814	0.39603	1.10069	0.44991	0.286206	0.958765	0.264725	0.334681	1.0439	0.255009	0.228778
CAU - Histidine	Percentage of Codon CAU	composition	Codons	PothersCOD	0.994117	0.216143	0.162672	1.13239	0.387222	0.244637	0.810519	0.294667	0.220043	1.56079	0.414574	0.335612	2.02592	0.436113	0.558623
CCA - Proline	Percentage of Codon CCA	composition	Codons	PothersCOD	0.886131	0.269728	0.163161	1.42823	0.409536	0.21416	0.941119	0.303287	0.297857	1.40216	0.492658	1.1669	1.12657	0.224072	0.203141
CCC - Proline	Percentage of Codon CCC	composition	Codons	PothersCOD	1.08771	0.237435	0.20275	0.942	0.262696	0.297056	1.33631	0.417321	0.432516	0.895678	0.267663	0.333973	1.01061	0.178672	0.20544
CCG - Proline	Percentage of Codon CCG	composition	Codons	PothersCOD	0.732815	0.330192	0.261737	0.776963	0.256083	0.178389	1.03848	0.391626	0.186234	1.36345	0.664026	0.736075	3.67435	1.63735	1.77417
CCU - Proline	Percentage of Codon CCU	composition	Codons	PothersCOD	1.14264	0.23194	0.201282	1.00462	0.440435	0.45071	0.922877	0.361657	0.314676	1.40098	0.484085	0.277928	1.79543	0.763634	0.402332
CGA - Arginine	Percentage of Codon CGA	composition	Codons	positive COD	1.1745	0.352903	0.31538	1.17024	0.347526	0.367304	0.967122	0.421543	0.310252	2.13098	0.398246	0.948192	2.44751	0.479569	0.57962
CGC - Arginine	Percentage of Codon CGC	composition	Codons	positive COD	1.48302	0.379027	0.377296	0.999785	0.285561	0.282538	1.26968	0.432598	0.526099	0.832989	0.287778	0.305147	1.11787	0.173507	0.193132
CGG - Arginine	Percentage of Codon CGG	composition	Codons	positive COD	0.918639	0.275857	0.23509	1.24166	0.608557	0.34283	0.973288	0.333874	0.281236	0.791526	0.243163	0.279357	0.677459	0.173547	0.20943
CGU - Arginine	Percentage of Codon CGU	composition	Codons	positive COD	0.857966	0.282072	0.18235	0.958134	0.395459	0.369461	0.836801	0.328566	0.301806	2.20752	1.13457	0.730777	5.01386	5.89937	6.26347
CUA - Leucine	Percentage of Codon CUA	composition	Codons	Lsmall hydro COD	0.878553	0.310646	0.254945	1.64105	0.608223	0.463747	0.8539	0.303319	0.284077	1.88288	0.924628	2.37548	3.48854	1.38081	2.3664
CUC - Leucine	Percentage of Codon CUC	composition	Codons	Lsmall hydro COD	0.773167	0.374072	0.208539	0.984287	0.321179	0.193626	1.24526	0.408444	0.358054	0.868729	0.302344	0.16871	0.733806	0.189712	0.262059
CUG - Leucine	Percentage of Codon CUG	composition	Codons	Lsmall hydro COD	0.902355	0.238002	0.203618	0.85911	0.260446	0.254036	1.27661	0.673816	0.480858	0.643326	0.178745	0.147913	0.528456	0.0990768	0.127464
CUU - Leucine	Percentage of Codon CUU	composition	Codons	Lsmall hydro COD	0.836886	0.211493	0.171731	1.04413	0.417318	0.285604	1.53152	0.488777	0.453896	0.945494	0.41837	0.663197	1.26159	0.241718	0.23619
GAA - Glutamate	Percentage of Codon GAA	composition	Codons	negative COD	1.24968	0.326237	0.392057	0.751185	0.284208	0.20693	1.34283	0.507362	0.371506	1.04728	0.417155	0.254251	0.458613	0.109285	0.12238
GAC - Aspartate	Percentage of Codon GAC	composition	Codons	negative COD	0.906717	0.358511	0.367263	0.858591	0.267726	0.194199	1.43463	0.564519	0.356156	1.17946	0.370857	0.534515	0.670699	0.152825	0.143787
GAG - Glutamate	Percentage of Codon GAG	composition	Codons	negative COD	1.85636	0.572586	0.652468	0.895174	0.385575	0.34865	1.52793	0.73083	0.95864	0.686846	0.223797	0.187459	0.576894	0.126353	0.147767
GAU - Aspartate	Percentage of Codon GAU	composition	Codons	negative COD	1.7952	0.611712	0.639709	0.749535	0.287454	0.214606	0.88745	0.30937	0.224906	0.678407	0.19948	0.238234	0.584558	0.131745	0.135811
GCA - Alanine	Percentage of Codon GCA	composition	Codons	Asmall hydro COD	1.01678	0.427752	0.325495	1.19991	0.371142	0.287673	1.07865	0.322347	0.420088	0.832207	0.258577	0.263284	0.595174	0.140704	0.167514
GCC - Alanine	Percentage of Codon GCC	composition	Codons	Asmall hydro COD	2.35091	0.77907	0.929181	1.46077	0.738614	0.34385	2.12003	1.1385	0.454263	0.741638	0.344519	0.290228	0.488963	0.0877649	0.117346
GCG - Alanine	Percentage of Codon GCG	composition	Codons	Asmall hydro COD	2.2137	1.08903	0.664647	0.795852	0.206915	0.164459	1.06375	0.295485	0.538607	1.46037	0.547801	0.533788	1.88661	0.546178	0.321491
GCU - Alanine	Percentage of Codon GCU	composition	Codons	Asmall hydro COD	2.03931	1.45553	0.70264	2.55042	1.84326	0.704611	0.972888	0.382871	0.268787	1.10929	0.398859	0.275322	0.787006	0.205441	0.220553
GGA - Glycine	Percentage of Codon GGA	composition	Codons	others	1.16348	0.342085	0.236071	0.960345	0.276436	0.26526	1.13342	0.386135	0.2415	0.855661	0.301265	0.213656	0.699959	0.174519	0.125541
GGC - Glycine	Percentage of Codon GGC	composition	Codons	others	0.86353	0.256647	0.152125	1.1154	0.348085	0.235309	1.62934	0.562551	0.320651	0.840015	0.271205	0.296662	0.511565	0.11598	0.135035
GGG - Glycine	Percentage of Codon GGG	composition	Codons	others	1.13406	0.326448	0.240714	0.891691	0.302745	0.189179	0.977888	0.315084	0.324959	0.942611	0.275916	0.235165	0.596464	0.242578	0.201116
GGU - Glycine	Percentage of Codon GGU	composition	Codons	others	0.791134	0.285346	0.163746	1.70688	0.804834	0.545239	1.00402	0.317537	0.334747	0.99567	0.296893	0.181319	1.39228	0.211272	0.226321
GUA - Valine	Percentage of Codon GUA	composition	Codons	small hydro COD	1.33432	0.249446	0.17796	1.37945	0.326106	0.254749	1.28932	0.536493	0.274908	2.24306	1.35547	2.54698	2.68025	0.958094	0.484296
GUC - Valine	Percentage of Codon GUC	composition	Codons	small hydro COD	1.3135	0.39896	0.26901	1.25455	0.36006	0.27699	1.23357	0.46383	0.320929	1.01199	0.309712	0.232035	0.726866	0.169996	0.139971
GUG - Valine	Percentage of Codon GUG	composition	Codons	small hydro COD	1.27402	0.382476	0.254894	0.85491	0.269276	0.181007	1.06657	0.425049	0.313087	1.18848	0.413298	0.450633	0.538191	0.130927	0.13539
GUU - Valine	Percentage of Codon GUU	composition	Codons	small hydro COD	1.19581	0.331775	0.31663	0.745087	0.332356	0.195708	1.77673	0.724665	0.632918	0.697259	0.236559	0.156331	1.10649	0.119752	0.102504
UAC - Tyrosine	Percentage of Codon UAC	composition	Codons	others	0.993581	0.279289	0.156087	0.774351	0.228669	0.248859	1.08949	0.325886	0.241613	1.13843	0.275928	1.13877	0.677655	0.19218	0.173384
UAU - Tyrosine	Percentage of Codon UAU	composition	Codons	others	0.83753	0.294718	0.23232	0.809001	0.247422	0.208871	1.15716	0.385465	0.249876	1.00804	0.375276	0.263958	1.01286	0.197152	0.149002
UCA - Serine	Percentage of Codon UCA	composition	Codons	phosphor COD	0.897483	0.248032	0.251792	3.07254	1.042	0.419798	0.955193	0.301864	0.254905	3.59022	3.31058	2.81524	4.06686	5.59224	9.32382
UCC - Serine	Percentage of Codon UCC	composition	Codons	phosphor COD	1.33669	0.369348	0.340693	1.0486	0.301769	0.234088	1.03015	0.387577	0.492105	1.03264	0.323982	0.280185	0.821032	0.177058	0.219405
UCG - Serine	Percentage of Codon UCG	composition	Codons	phosphor COD	0.896585	0.349039	0.403137	1.19842	0.277208	0.151994	0.717707	0.26241	0.261834	2.6591	1.70306	1.11887	5.1131	6.06964	5.16877
UCU - Serine	Percentage of Codon UCU	composition	Codons	phosphor COD	0.943666	0.331126	0.302198	0.893524	0.255102	0.246711	1.01559	0.39741	0.291221	1.65759	0.659869	0.94191	2.45738	1.11962	0.637929
UGC - Cysteine	Percentage of Codon UGC	composition	Codons	PothersCOD	0.778339	0.205575	0.236708	1.02162	0.254437	0.273786	0.931127	0.271595	0.225192	0.835583	0.210809	0.213542	1.60038	0.126701	0.257168
UGG - Tryptophan	Percentage of Codon UGG	composition	Codons	PothersCOD	1.10243	0.328015	0.171196	0.835382	0.275961	0.390004	0.812947	0.277609	0.250885	1.42818	0.319726	0.45566	1.30367	0.261015	0.210968
UGU - Cysteine	Percentage of Codon UGU	composition	Codons	PothersCOD	1.1454	0.304457	0.164028	1.08835	0.366612	0.329106	0.78881	0.207886	0.211643	1.29698	0.676714	0.321174	2.53336	0.453145	0.674027
UUA - Leucine	Percentage of Codon UUA	composition	Codons	Lsmall hydro COD	1.06928	0.266444	0.230723	0.873513	0.252706	0.280981	2.67456	1.93817	2.63155	3.13573	2.66867	1.75907	3.29364	1.40247	1.14253
UUC - Phenylalanine	Percentage of Codon UUC	composition	Codons	others	0.82485	0.258931	0.31617	0.753365	0.211759	0.272978	1.26274	0.499539	0.307793	1.03786	0.305762	0.507504	0.556676	0.196963	0.159553
UUG - Leucine	Percentage of Codon UUG	composition	Codons	Lsmall hydro COD	0.983446	0.268078	0.259678	1.35677	0.605318	0.324574	1.08473	0.57271	0.544112	0.873917	0.28725	0.261782	0.695081	0.179818	0.157904
UUU - Phenylalanine	Percentage of Codon UUU	composition	Codons	others	1.13192	0.385424	0.355754	1.17405	0.61016	0.309135	1.11916	0.465421	0.467239	0.719399	0.262553	0.416224	0.515128	0.0987421	0.129701
C.AAA struct Lysine	percentage of AAA in coiled-coil	sequence features	Expected protein secondary structure	positive COD		0.186474	0.152719		0.191206	0.192377		0.212897	0.205719		0.148319	0.135872		0.0793064	0.0773181
C.AAC struct Asparagine	percentage of AAC in coiled-coil	sequence features	Expected protein secondary structure	negative COD		0.157119	0.140698		0.229639	0.366339		0.195163	0.207944		0.155492	0.297017		0.0671728	0.08395
C.AAG struct Lysine	percentage of AAG in coiled-coil	sequence features	Expected protein secondary structure	positive COD		0.341839	0.269166		0.288183	0.363032		0.556898	0.437745		0.326721	0.492191		0.115797	0.124475
C.AAU struct Asparagine	percentage of AAU in coiled-coil	sequence features	Expected protein secondary structure	negative COD		0.154512	0.118359		0.153734	0.111148		0.15447	0.139266		0.104201	0.0939605		0.0393863	0.0475247
C.ACA struct Threonine	percentage of ACA in coiled-coil	sequence features	Expected protein secondary structure	phosphor COD		0.106358	0.091047		0.118285	0.107903		0.247075	0.181158		0.0752403	0.0618116		0.0596392	0.0536346
C.ACC struct Threonine	percentage of ACC in coiled-coil	sequence features	Expected protein secondary structure	phosphor COD		0.138789	0.111756		0.18585	0.212768		0.224725	0.173925		0.185876	0.119715		0.0686322	0.0644113
C.ACG struct Threonine	percentage of ACG in coiled-coil	sequence features	Expected protein secondary structure	phosphor COD		0.0980854	0.104423		0.149107	0.0675329		0.154064	0.112021		0.123403	0.0760295		0.0397125	0.0263897
C.ACU struct Threonine	percentage of ACU in coiled-coil	sequence features	Expected protein secondary structure	phosphor COD		0.191674	0.210613		0.144388	0.210959		0.230506	0.263328		0.0794643	0.0673457		0.0437319	0.040807
C.AGA struct Arginine	percentage of AGA in coiled-coil	sequence features	Expected protein secondary structure	positive COD		0.124533	0.0786311		0.10378	0.0773029		0.153533	0.0790569		0.0992863	0.0556967		0.0472547	0.0397258
C.AGC struct Serine	percentage of AGC in coiled-coil	sequence features	Expected protein secondary structure	phosphor COD		0.207154	0.141705		0.193915	0.15145		0.16859	0.153082		0.145608	0.153344		0.0709387	0.0688834
C.AGG struct Arginine	percentage of AGG in coiled-coil	sequence features	Expected protein secondary structure	positive COD		0.187224	0.150371		0.153905	0.134295		0.187758	0.137876		0.0894906	0.124147		0.0635173	0.0525622
C.AGU struct Serine	percentage of AGU in coiled-coil	sequence features	Expected protein secondary structure	phosphor COD		0.105766	0.0821061		0.133358	0.0780959		0.13456	0.181812		0.101701	0.1293		0.0643715	0.0591569
C.AUA struct Isoleucine	percentage of AUA in coiled-coil	sequence features	Expected protein secondary structure	small hydro COD		0.218175	0.0904657		0.0627292	0.0652974		0.0611981	0.0365964		0.0509094	0.0914978		0.0295944	0.0295278
C.AUC struct Isoleucine	percentage of AUC in coiled-coil	sequence features	Expected protein secondary structure	small hydro COD		0.812578	0.828601		0.217907	0.204358		0.224072	0.238938		0.117072	0.10942		0.0669673	0.0597404
C.AUG struct Methionine	percentage of AUG in coiled-coil	sequence features	Expected protein secondary structure	others		0.52915	0.449004		0.272699	0.314516		0.319358	0.34617		0.372737	0.248586		0.226939	0.20732
C.AUU struct Isoleucine	percentage of AUU in coiled-coil	sequence features	Expected protein secondary structure	small hydro COD		0.255585	0.173881		0.193212	0.0986286		0.173497	0.113694		0.0783484	0.111443		0.0450223	0.0594971
C.CAA struct Glutamine	percentage of CAA in coiled-coil	sequence features	Expected protein secondary structure	negative COD		0.126568	0.104315		0.102186	0.0993016		0.0949201	0.0660174		0.0582972	0.0650091		0.043169	0.0396951
C.CAC struct Histidine	percentage of CAC in coiled-coil	sequence features	Expected protein secondary structure	funny structure COD		0.0855911	0.113554		0.116884	0.0843069		0.159002	0.138935		0.153041	0.177508		0.0492447	0.0587508
C.CAG struct Glutamine	percentage of CAG in coiled-coil	sequence features	Expected protein secondary structure	negative COD		0.310457	0.210598		0.437407	0.337359		0.216765	0.243192		0.155705	0.145337		0.0825139	0.0872016
C.CAU struct Histidine	percentage of CAU in coiled-coil	sequence features	Expected protein secondary structure	funny structure COD		0.140475	0.0562366		0.155751	0.113866		0.244761	0.170736		0.0653118	0.054575		0.052898	0.0419702
C.CCA struct Proline	percentage of CCA in coiled-coil	sequence features	Expected protein secondary structure	funny structure COD		0.0911545	0.0727311		0.125137	0.107639		0.126092	0.145813		0.0936197	0.0814291		0.0621031	0.0642234
C.CCC struct Proline	percentage of CCC in coiled-coil	sequence features	Expected protein secondary structure	funny structure COD		0.214759	0.205701		0.140088	0.156866		0.210407	0.278374		0.12393	0.163221		0.0609213	0.0773642
C.CCG struct Proline	percentage of CCG in coiled-coil	sequence features	Expected protein secondary structure	funny structure COD		0.119238	0.111479		0.116542	0.152759		0.178581	0.156421		0.14033	0.139917		0.068824	0.0551283
C.CCU struct Proline	percentage of CCU in coiled-coil	sequence features	Expected protein secondary structure	funny structure COD		0.124677	0.0756241		0.159493	0.112305		0.200303	0.149131		0.0949159	0.14583		0.108659	0.0516952
C.CGA struct Arginine	percentage of CGA in coiled-coil	sequence features	Expected protein secondary structure	positive COD		0.167841	0.110329		0.0826738	0.0594789		0.12695	0.103751		0.0729139	0.0722446		0.032969	0.03946
C.CGC struct Arginine	percentage of CGC in coiled-coil	sequence features	Expected protein secondary structure	positive COD		0.33672	0.173202		0.145468	0.114416		0.262275	0.173144		0.143804	0.188084		0.0460882	0.0477784
C.CGG struct Arginine	percentage of CGG in coiled-coil	sequence features	Expected protein secondary structure	positive COD		0.405988	0.22969		0.276394	0.19288		0.19903	0.178191		0.101835	0.115177		0.0514432	0.0584732
C.CGU struct Arginine	percentage of CGU in coiled-coil	sequence features	Expected protein secondary structure	positive COD		0.25068	0.127648		0.0669739	0.0656492		0.140837	0.0877862		0.0439979	0.0402322		0.0270618	0.0364609
C.CUA struct Leucine	percentage of CUA in coiled-coil	sequence features	Expected protein secondary structure	Lsmall hydro COD		0.0873817	0.0545954		0.0901601	0.0838528		0.24763	0.0513441		0.0993564	0.061185		0.100281	0.078194
C.CUC struct Leucine	percentage of CUC in coiled-coil	sequence features	Expected protein secondary structure	Lsmall hydro COD		0.342715	0.18752		0.172494	0.171849		0.189114	0.296802		0.118566	0.167859		0.0781598	0.0840812
C.CUG struct Leucine	percentage of CUG in coiled-coil	sequence features	Expected protein secondary structure	Lsmall hydro COD		0.199096	0.149175		0.2262	0.202794		0.260239	0.203004		0.146034	0.102646		0.120311	0.12706
C.CUU struct Leucine	percentage of CUU in coiled-coil	sequence features	Expected protein secondary structure	Lsmall hydro COD		0.164842	0.105491		0.0916237	0.0799667		0.134385	0.15527		0.0751922	0.0799674		0.0456031	0.0388495
C.GAA struct Glutamate	percentage of GAA in coiled-coil	sequence features	Expected protein secondary structure	negative COD		0.157755	0.103918		0.197333	0.1625		0.328172	0.123567		0.151003	0.141293		0.0723179	0.0758681
C.GAC struct Aspartate	percentage of GAC in coiled-coil	sequence features	Expected protein secondary structure	negative COD		0.213766	0.226745		0.23519	0.242977		0.451852	0.270319		0.152851	0.157446		0.0790459	0.0981043
C.GAG struct Glutamate	percentage of GAG in coiled-coil	sequence features	Expected protein secondary structure	negative COD		0.637121	0.417698		0.305062	0.320147		0.392496	0.325515		0.187953	0.16928		0.10966	0.126436
C.GAU struct Aspartate	percentage of GAU in coiled-coil	sequence features	Expected protein secondary structure	negative COD		0.232533	0.146344		0.270217	0.149407		0.194494	0.256395		0.144453	0.0996323		0.0697838	0.0561183
C.GCA struct Serine	percentage of GCA in coiled-coil	sequence features	Expected protein secondary structure	Asmall hydro COD		0.1935	0.125665		0.2396	0.268481		0.154383	0.180503		0.130271	0.142118		0.0603201	0.0770387
C.GCC struct Serine	percentage of GCC in coiled-coil	sequence features	Expected protein secondary structure	Asmall hydro COD		0.224215	0.156807		0.364057	0.217649		0.253765	0.239479		0.163987	0.148691		0.0920153	0.0900301
C.GCG struct Serine	percentage of GCG in coiled-coil	sequence features	Expected protein secondary structure	Asmall hydro COD		0.358449	0.168134		0.155454	0.0983972		0.153965	0.234485		0.119055	0.130898		0.119462	0.102193
C.GCU struct Serine	percentage of GCU in coiled-coil	sequence features	Expected protein secondary structure	Asmall hydro COD		0.331881	0.216104		0.360682	0.161298		0.239133	0.138933		0.186594	0.150611		0.0856945	0.0745084
C.GGA struct Glycine	percentage of GGA in coiled-coil	sequence features	Expected protein secondary structure	others		0.224213	0.13405		0.262864	0.168735		0.152456	0.149063		0.121376	0.083731		0.0785811	0.0710917
C.GGC struct Glycine	percentage of GGC in coiled-coil	sequence features	Expected protein secondary structure	others		0.267912	0.187528		0.244355	0.217322		0.213305	0.165256		0.202845	0.255193		0.0839939	0.0893948
C.GGG struct Glycine	percentage of GGG in coiled-coil	sequence features	Expected protein secondary structure	others		0.255148	0.189455		0.194378	0.186335		0.227591	0.162426		0.13046	0.149038		0.0872343	0.0882885
C.GGU struct Glycine	percentage of GGU in coiled-coil	sequence features	Expected protein secondary structure	others		0.182615	0.117305		0.149327	0.164871		0.154861	0.190769		0.124958	0.120115		0.0654232	0.0584896
C.GUA struct Valine	percentage of GUA in coiled-coil	sequence features	Expected protein secondary structure	small hydro COD		0.139285	0.0827198		0.0688544	0.0769589		0.0939241	0.087882		0.0440534	0.0452139		0.0317053	0.0344763
C.GUC struct Valine	percentage of GUC in coiled-coil	sequence features	Expected protein secondary structure	small hydro COD		0.199567	0.151472		0.16571	0.162407		0.143709	0.179734		0.099726	0.104937		0.0544341	0.0576238
C.GUG struct Valine	percentage of GUG in coiled-coil	sequence features	Expected protein secondary structure	small hydro COD		0.254902	0.200164		0.232651	0.197482		0.264534	0.202788		0.197594	0.216316		0.0856675	0.0724677
C.GUU struct Valine	percentage of GUU in coiled-coil	sequence features	Expected protein secondary structure	small hydro COD		0.191681	0.0781473		0.167703	0.182266		0.128952	0.122331		0.0816545	0.057069		0.0417817	0.0305187
C.UAC struct Tyrosine	percentage of UAC in coiled-coil	sequence features	Expected protein secondary structure	others		0.110355	0.083351		0.145296	0.107728		0.251357	0.138417		0.108371	0.0868412		0.0563769	0.0588518
C.UAU struct Tyrosine	percentage of UAU in coiled-coil	sequence features	Expected protein secondary structure	others		0.145805	0.0889481		0.0934585	0.089009		0.176251	0.168313		0.0806389	0.0612081		0.0387257	0.0448069
C.UCA struct Serine	percentage of UCA in coiled-coil	sequence features	Expected protein secondary structure	phosphor COD		0.137668	0.0605441		0.101459	0.116416		0.107085	0.0785377		0.0703125	0.0978087		0.0522007	0.0449896
C.UCC struct Serine	percentage of UCC in coiled-coil	sequence features	Expected protein secondary structure	phosphor COD		0.240709	0.125014		0.183897	0.170207		0.275313	0.161848		0.160357	0.165897		0.0591182	0.0559422
C.UCG struct Serine	percentage of UCG in coiled-coil	sequence features	Expected protein secondary structure	phosphor COD		0.148242	0.0645306		0.103162	0.0986003		0.111687	0.106362		0.0720499	0.061566		0.0409766	0.0502489
C.UCU struct Serine	percentage of UCU in coiled-coil	sequence features	Expected protein secondary structure	phosphor COD		0.132603	0.132764		0.0941637	0.124892		0.165087	0.102335		0.0822809	0.0772029		0.0656484	0.062732
C.UGC struct Cysteine	percentage of UGC in coiled-coil	sequence features	Expected protein secondary structure	funny structure COD		0.124454	0.118527		0.134841	0.0592996		0.12024	0.100996		0.0919124	0.101202		0.0395716	0.0520622
C.UGG struct Tryptophan	percentage of UGG in coiled-coil	sequence features	Expected protein secondary structure	funny structure COD		0.153125	0.0732215		0.239473	0.22822		0.22877	0.149187		0.0906398	0.0730939		0.0525226	0.0476254
C.UGU struct Cysteine	percentage of UGU in coiled-coil	sequence features	Expected protein secondary structure	funny structure COD		0.10959	0.0833304		0.0708851	0.0978394		0.0952479	0.0589783		0.0422356	0.0327594		0.0388454	0.0389352
C.UUA struct Leucine	percentage of UUA in coiled-coil	sequence features	Expected protein secondary structure	Lsmall hydro COD		0.0886165	0.0768013		0.0558606	0.0829683		0.133366	0.0553443		0.0614375	0.0505999		0.0267271	0.0230241
C.UUC struct Phenylalanine	percentage of UUC in coiled-coil	sequence features	Expected protein secondary structure	others		0.16399	0.138892		0.271868	0.213289		0.215151	0.214479		0.130059	0.09789		0.0700361	0.0858637
C.UUG struct Leucine	percentage of UUG in coiled-coil	sequence features	Expected protein secondary structure	Lsmall hydro COD		0.12497	0.105613		0.122847	0.0927971		0.181087	0.13671		0.0693967	0.0896864		0.0870805	0.0785032
C.UUU struct Phenylalanine	percentage of UUU in coiled-coil	sequence features	Expected protein secondary structure	others		0.0862216	0.0777173		0.147065	0.0925241		0.141606	0.11116		0.0975838	0.0591928		0.0584897	0.0512674
E.AAA struct Lysine	percentage of AAA in extended beta sheet	sequence features	Expected protein secondary structure	positive COD		0.142857	0.113196		0.115102	0.106507		0.140052	0.118407		0.103465	0.0920604		0.0582625	0.0909207
E.AAC struct Asparagine	percentage of AAC in extended beta sheet	sequence features	Expected protein secondary structure	negative COD		0.126467	0.0833658		0.212053	0.115281		0.137761	0.149389		0.0864026	0.108762		0.0546959	0.0542365
E.AAG struct Lysine	percentage of AAG in extended beta sheet	sequence features	Expected protein secondary structure	positive COD		0.234526	0.193317		0.189022	0.19193		0.324758	0.325778		0.147067	0.182072		0.104772	0.0959576
E.AAU struct Asparagine	percentage of AAU in extended beta sheet	sequence features	Expected protein secondary structure	negative COD		0.0855106	0.104949		0.0874966	0.102238		0.126157	0.169783		0.0539047	0.0353395		0.0416775	0.0465579
E.ACA struct Threonine	percentage of ACA in extended beta sheet	sequence features	Expected protein secondary structure	phosphor COD		0.107271	0.0883955		0.0890935	0.0819056		0.113003	0.164072		0.0803621	0.107497		0.0398156	0.061601
E.ACC struct Threonine	percentage of ACC in extended beta sheet	sequence features	Expected protein secondary structure	phosphor COD		0.140172	0.118906		0.110676	0.0944029		0.161914	0.146864		0.141661	0.097007		0.0611398	0.0709532
E.ACG struct Threonine	percentage of ACG in extended beta sheet	sequence features	Expected protein secondary structure	phosphor COD		0.0644819	0.0600882		0.0767496	0.056704		0.166023	0.0581055		0.0832062	0.0592028		0.0397479	0.0448416
E.ACU struct Threonine	percentage of ACU in extended beta sheet	sequence features	Expected protein secondary structure	phosphor COD		0.121225	0.0423443		0.094774	0.0605811		0.209147	0.166022		0.0654841	0.0684248		0.0351379	0.0310429
E.AGA struct Arginine	percentage of AGA in extended beta sheet	sequence features	Expected protein secondary structure	positive COD		0.145383	0.124697		0.0894048	0.0582125		0.299963	0.103465		0.0638616	0.0639705		0.037001	0.0353751
E.AGC struct Serine	percentage of AGC in extended beta sheet	sequence features	Expected protein secondary structure	phosphor COD		0.172435	0.105752		0.0957784	0.109834		0.184357	0.137253		0.122798	0.173271		0.0709414	0.0928136
E.AGG struct Arginine	percentage of AGG in extended beta sheet	sequence features	Expected protein secondary structure	positive COD		0.27475	0.175953		0.124956	0.0759061		0.215997	0.206682		0.0675911	0.0547416		0.0474332	0.0388107
E.AGU struct Serine	percentage of AGU in extended beta sheet	sequence features	Expected protein secondary structure	phosphor COD		0.076425	0.0375521		0.062343	0.0375001		0.0924843	0.083724		0.06556	0.0501656		0.046461	0.0428811
E.AUA struct Isoleucine	percentage of AUA in extended beta sheet	sequence features	Expected protein secondary structure	small hydro COD		0.146394	0.107118		0.0436094	0.0248544		0.0447711	0.0356983		0.0387696	0.0301817		0.0255373	0.0252995
E.AUC struct Isoleucine	percentage of AUC in extended beta sheet	sequence features	Expected protein secondary structure	small hydro COD		0.21676	0.156611		0.171735	0.142253		0.225411	0.231679		0.169077	0.168664		0.130524	0.147436
E.AUG struct Methionine	percentage of AUG in extended beta sheet	sequence features	Expected protein secondary structure	others		0.169044	0.0902729		0.271489	0.225851		0.187131	0.22944		0.268398	0.210066		0.220329	0.243344
E.AUU struct Isoleucine	percentage of AUU in extended beta sheet	sequence features	Expected protein secondary structure	small hydro COD		0.107233	0.085955		0.227934	0.103839		0.110283	0.131647		0.110184	0.14219		0.0741948	0.0870522
E.CAA struct Glutamine	percentage of CAA in extended beta sheet	sequence features	Expected protein secondary structure	negative COD		0.0948297	0.0977724		0.0661148	0.0500033		0.0713456	0.0567487		0.0585867	0.0718455		0.029269	0.0293112
E.CAC struct Histidine	percentage of CAC in extended beta sheet	sequence features	Expected protein secondary structure	funny structure COD		0.114389	0.0855521		0.0925194	0.0813849		0.13165	0.117667		0.0632128	0.0848722		0.04938	0.0605357
E.CAG struct Glutamine	percentage of CAG in extended beta sheet	sequence features	Expected protein secondary structure	negative COD		0.30579	0.30949		0.252754	0.182514		0.237491	0.17598		0.148385	0.133412		0.127454	0.22163
E.CAU struct Histidine	percentage of CAU in extended beta sheet	sequence features	Expected protein secondary structure	funny structure COD		0.199554	0.11108		0.0555392	0.0758664		0.0933857	0.0413867		0.0358574	0.0195479		0.0396276	0.0339759
E.CCA struct Proline	percentage of CCA in extended beta sheet	sequence features	Expected protein secondary structure	funny structure COD		0.0795173	0.0666909		0.117477	0.101974		0.120571	0.101645		0.0611135	0.0601942		0.0413446	0.0434901
E.CCC struct Proline	percentage of CCC in extended beta sheet	sequence features	Expected protein secondary structure	funny structure COD		0.0878594	0.0854921		0.13548	0.111754		0.122105	0.0889266		0.124887	0.13611		0.110207	0.165504
E.CCG struct Proline	percentage of CCG in extended beta sheet	sequence features	Expected protein secondary structure	funny structure COD		0.0626707	0.0676985		0.0589601	0.0566086		0.0646089	0.0616924		0.0906716	0.104495		0.0685464	0.0580312
E.CCU struct Proline	percentage of CCU in extended beta sheet	sequence features	Expected protein secondary structure	funny structure COD		0.111658	0.0932427		0.0825038	0.0807254		0.0919388	0.0946222		0.0556647	0.0661577		0.0758301	0.0855825
E.CGA struct Arginine	percentage of CGA in extended beta sheet	sequence features	Expected protein secondary structure	positive COD		0.0914407	0.0605924		0.0673602	0.093998		0.11385	0.119613		0.0522766	0.0381325		0.0305215	0.0309279
E.CGC struct Arginine	percentage of CGC in extended beta sheet	sequence features	Expected protein secondary structure	positive COD		0.280523	0.143288		0.169128	0.0893735		0.112528	0.134302		0.143701	0.0931393		0.0459092	0.0494306
E.CGG struct Arginine	percentage of CGG in extended beta sheet	sequence features	Expected protein secondary structure	positive COD		0.351204	0.2644		0.103139	0.141252		0.109792	0.127979		0.0867214	0.0857049		0.0498163	0.0530382
E.CGU struct Arginine	percentage of CGU in extended beta sheet	sequence features	Expected protein secondary structure	positive COD		0.550309	0.138693		0.0436237	0.048814		0.110813	0.0786247		0.0255935	0.0309079		0.0229748	0.0208689
E.CUA struct Leucine	percentage of CUA in extended beta sheet	sequence features	Expected protein secondary structure	Lsmall hydro COD		0.140485	0.10846		0.0760645	0.102134		0.136971	0.0398202		0.0505706	0.042928		0.0400044	0.0283949
E.CUC struct Leucine	percentage of CUC in extended beta sheet	sequence features	Expected protein secondary structure	Lsmall hydro COD		0.170353	0.14635		0.190822	0.162286		0.236165	0.143254		0.179865	0.11331		0.0583567	0.0721511
E.CUG struct Leucine	percentage of CUG in extended beta sheet	sequence features	Expected protein secondary structure	Lsmall hydro COD		0.230508	0.194195		0.187986	0.223477		0.199603	0.163108		0.172139	0.198017		0.0930084	0.0896591
E.CUU struct Leucine	percentage of CUU in extended beta sheet	sequence features	Expected protein secondary structure	Lsmall hydro COD		0.0879051	0.0335113		0.0973975	0.108497		0.0753631	0.0519966		0.11046	0.384686		0.0475661	0.0332744
E.GAA struct Glutamate	percentage of GAA in extended beta sheet	sequence features	Expected protein secondary structure	negative COD		0.128106	0.0912577		0.174419	0.111434		0.200532	0.144538		0.0941355	0.0937137		0.056343	0.0683506
E.GAC struct Aspartate	percentage of GAC in extended beta sheet	sequence features	Expected protein secondary structure	negative COD		0.119363	0.126315		0.137869	0.0999216		0.203112	0.135669		0.159304	0.186743		0.142306	0.132936
E.GAG struct Glutamate	percentage of GAG in extended beta sheet	sequence features	Expected protein secondary structure	negative COD		0.217434	0.173606		0.235484	0.126447		0.246231	0.170807		0.202141	0.122348		0.14384	0.257084
E.GAU struct Aspartate	percentage of GAU in extended beta sheet	sequence features	Expected protein secondary structure	negative COD		0.169143	0.132267		0.148027	0.104112		0.181793	0.124188		0.0873959	0.0813336		0.102693	0.0890477
E.GCA struct Serine	percentage of GCA in extended beta sheet	sequence features	Expected protein secondary structure	Asmall hydro COD		0.1748	0.104409		0.134807	0.130256		0.11776	0.0778938		0.133991	0.139128		0.0442569	0.0726488
E.GCC struct Serine	percentage of GCC in extended beta sheet	sequence features	Expected protein secondary structure	Asmall hydro COD		0.286685	0.230841		0.219469	0.121215		0.196387	0.19657		0.159883	0.164834		0.103088	0.115872
E.GCG struct Serine	percentage of GCG in extended beta sheet	sequence features	Expected protein secondary structure	Asmall hydro COD		0.173115	0.113054		0.0750218	0.0741953		0.14245	0.167673		0.0665615	0.0740738		0.0602372	0.047748
E.GCU struct Serine	percentage of GCU in extended beta sheet	sequence features	Expected protein secondary structure	Asmall hydro COD		0.254951	0.173715		0.126835	0.10271		0.134551	0.111335		0.14973	0.124728		0.0921699	0.0892959
E.GGA struct Glycine	percentage of GGA in extended beta sheet	sequence features	Expected protein secondary structure	others		0.224659	0.153535		0.164024	0.125466		0.0980786	0.0948283		0.0769205	0.0738889		0.0584699	0.082978
E.GGC struct Glycine	percentage of GGC in extended beta sheet	sequence features	Expected protein secondary structure	others		0.16476	0.119141		0.159609	0.1804		0.166344	0.122485		0.147776	0.158869		0.0648765	0.115534
E.GGG struct Glycine	percentage of GGG in extended beta sheet	sequence features	Expected protein secondary structure	others		0.161983	0.132644		0.100219	0.105084		0.140501	0.105792		0.109238	0.0905129		0.0741537	0.120494
E.GGU struct Glycine	percentage of GGU in extended beta sheet	sequence features	Expected protein secondary structure	others		0.100155	0.101762		0.074887	0.112639		0.185336	0.157134		0.0666758	0.0530299		0.0539478	0.0458586
E.GUA struct Valine	percentage of GUA in extended beta sheet	sequence features	Expected protein secondary structure	small hydro COD		0.233003	0.167574		0.0942039	0.0768473		0.193433	0.0890862		0.0795356	0.111293		0.0375794	0.0321612
E.GUC struct Valine	percentage of GUC in extended beta sheet	sequence features	Expected protein secondary structure	small hydro COD		0.212532	0.158932		0.102864	0.12099		0.182453	0.161984		0.193319	0.337112		0.0743381	0.109675
E.GUG struct Valine	percentage of GUG in extended beta sheet	sequence features	Expected protein secondary structure	small hydro COD		0.441615	0.598606		0.15131	0.175784		0.264837	0.224328		0.268993	0.324234		0.173614	0.197807
E.GUU struct Valine	percentage of GUU in extended beta sheet	sequence features	Expected protein secondary structure	small hydro COD		0.0855526	0.0575259		0.0874942	0.155104		0.0914662	0.152732		0.0962529	0.166265		0.0518441	0.0744995
E.UAC struct Tyrosine	percentage of UAC in extended beta sheet	sequence features	Expected protein secondary structure	others		0.0975054	0.0556858		0.0858572	0.0976966		0.165013	0.208307		0.0942733	0.215853		0.0582002	0.0702183
E.UAU struct Tyrosine	percentage of UAU in extended beta sheet	sequence features	Expected protein secondary structure	others		0.0696885	0.0379871		0.109343	0.0767774		0.129935	0.0807853		0.0646897	0.0321397		0.0266454	0.0318299
E.UCA struct Serine	percentage of UCA in extended beta sheet	sequence features	Expected protein secondary structure	phosphor COD		0.0786812	0.0622221		0.0573253	0.061759		0.15144	0.0623597		0.0671493	0.0393656		0.0369172	0.0418721
E.UCC struct Serine	percentage of UCC in extended beta sheet	sequence features	Expected protein secondary structure	phosphor COD		0.167624	0.107393		0.133206	0.112919		0.151813	0.1269		0.0782445	0.0688605		0.0719869	0.0755264
E.UCG struct Serine	percentage of UCG in extended beta sheet	sequence features	Expected protein secondary structure	phosphor COD		0.0641041	0.034828		0.0607766	0.0947079		0.0790946	0.0648205		0.0587749	0.0532338		0.0445944	0.0342824
E.UCU struct Serine	percentage of UCU in extended beta sheet	sequence features	Expected protein secondary structure	phosphor COD		0.0849653	0.0800827		0.0849018	0.0953706		0.144827	0.0853492		0.0619105	0.0597438		0.0901278	0.0792786
E.UGC struct Cysteine	percentage of UGC in extended beta sheet	sequence features	Expected protein secondary structure	funny structure COD		0.118274	0.0773144		0.0770628	0.0690533		0.110637	0.112584		0.0701093	0.0621817		0.0381299	0.0442217
E.UGG struct Tryptophan	percentage of UGG in extended beta sheet	sequence features	Expected protein secondary structure	funny structure COD		0.0656461	0.121334		0.22709	0.251182		0.28212	0.0943712		0.0694859	0.100257		0.0357011	0.0603587
E.UGU struct Cysteine	percentage of UGU in extended beta sheet	sequence features	Expected protein secondary structure	funny structure COD		0.101548	0.0629924		0.0419747	0.0629212		0.0620341	0.048747		0.0278982	0.028256		0.0238062	0.0242108
E.UUA struct Leucine	percentage of UUA in extended beta sheet	sequence features	Expected protein secondary structure	Lsmall hydro COD		0.0449208	0.0595762		0.0583544	0.0368584		0.0708395	0.0611145		0.0590224	0.0393033		0.0245019	0.023285
E.UUC struct Phenylalanine	percentage of UUC in extended beta sheet	sequence features	Expected protein secondary structure	others		0.127206	0.191598		0.119884	0.0967231		0.130035	0.230921		0.124644	0.0833693		0.106237	0.11006
E.UUG struct Leucine	percentage of UUG in extended beta sheet	sequence features	Expected protein secondary structure	Lsmall hydro COD		0.0498672	0.0678217		0.115166	0.0701797		0.242855	0.0839189		0.0928419	0.110072		0.0522298	0.0635584
E.UUU struct Phenylalanine	percentage of UUU in extended beta sheet	sequence features	Expected protein secondary structure	others		0.217408	0.0927862		0.0899761	0.0782823		0.124486	0.100917		0.0744527	0.0672543		0.0472683	0.0904969
H.AAA struct Lysine	percentage of AAA in alpha helix	sequence features	Expected protein secondary structure	positive COD		0.197989	0.117649		0.154455	0.194674		0.231615	0.201495		0.191606	0.14206		0.0849956	0.119405
H.AAC struct Asparagine	percentage of AAC in alpha helix	sequence features	Expected protein secondary structure	negative COD		0.217559	0.169531		0.14513	0.150124		0.230645	0.176564		0.135213	0.117204		0.0827102	0.0991257
H.AAG struct Lysine	percentage of AAG in alpha helix	sequence features	Expected protein secondary structure	positive COD		0.193343	0.175966		0.292777	0.336633		0.407899	0.375124		0.240873	0.297283		0.120867	0.116111
H.AAU struct Asparagine	percentage of AAU in alpha helix	sequence features	Expected protein secondary structure	negative COD		0.123308	0.0593215		0.124569	0.129142		0.251177	0.194435		0.119241	0.0682596		0.0643162	0.0622094
H.ACA struct Threonine	percentage of ACA in alpha helix	sequence features	Expected protein secondary structure	phosphor COD		0.10489	0.0975896		0.119804	0.0798087		0.259129	0.120311		0.107285	0.0639204		0.0524296	0.0535146
H.ACC struct Threonine	percentage of ACC in alpha helix	sequence features	Expected protein secondary structure	phosphor COD		0.176599	0.150288		0.230626	0.176353		0.182769	0.156054		0.14578	0.091888		0.0692309	0.0678725
H.ACG struct Threonine	percentage of ACG in alpha helix	sequence features	Expected protein secondary structure	phosphor COD		0.422367	0.443705		0.123415	0.0908007		0.226043	0.12696		0.139844	0.300849		0.0450409	0.0675454
H.ACU struct Threonine	percentage of ACU in alpha helix	sequence features	Expected protein secondary structure	phosphor COD		0.301706	0.187566		0.193158	0.112258		0.175084	0.124199		0.0753538	0.0864274		0.0476378	0.0462715
H.AGA struct Arginine	percentage of AGA in alpha helix	sequence features	Expected protein secondary structure	positive COD		0.214085	0.14977		0.122157	0.0771065		0.201769	0.140225		0.121205	0.0763822		0.046399	0.047314
H.AGC struct Serine	percentage of AGC in alpha helix	sequence features	Expected protein secondary structure	phosphor COD		0.312691	0.320477		0.182307	0.160518		0.171318	0.15321		0.139602	0.139882		0.0631852	0.11001
H.AGG struct Arginine	percentage of AGG in alpha helix	sequence features	Expected protein secondary structure	positive COD		0.265871	0.277205		0.0935724	0.157824		0.224053	0.154153		0.162568	0.0769313		0.0636697	0.0536393
H.AGU struct Serine	percentage of AGU in alpha helix	sequence features	Expected protein secondary structure	phosphor COD		0.117227	0.0564394		0.118426	0.0768618		0.140405	0.17278		0.117519	0.0767769		0.055917	0.0457181
H.AUA struct Isoleucine	percentage of AUA in alpha helix	sequence features	Expected protein secondary structure	small hydro COD		0.103398	0.0721948		0.04308	0.0334606		0.206229	0.129373		0.0547571	0.0421917		0.0315408	0.0315465
H.AUC struct Isoleucine	percentage of AUC in alpha helix	sequence features	Expected protein secondary structure	small hydro COD		0.245588	0.183342		0.161677	0.139424		0.307973	0.249313		0.160244	0.0926384		0.0616327	0.0609311
H.AUG struct Methionine	percentage of AUG in alpha helix	sequence features	Expected protein secondary structure	others		0.257116	0.158139		0.274166	0.220653		0.294634	0.224487		0.215622	0.262768		0.131247	0.106266
H.AUU struct Isoleucine	percentage of AUU in alpha helix	sequence features	Expected protein secondary structure	small hydro COD		0.149725	0.112564		0.278226	0.134252		0.198403	0.156778		0.0826182	0.085987		0.0509501	0.0684144
H.CAA struct Glutamine	percentage of CAA in alpha helix	sequence features	Expected protein secondary structure	negative COD		0.122566	0.0723002		0.117086	0.17933		0.132271	0.0742769		0.0967337	0.0691895		0.0375916	0.0446692
H.CAC struct Histidine	percentage of CAC in alpha helix	sequence features	Expected protein secondary structure	funny structure COD		0.111471	0.119073		0.130571	0.102182		0.180739	0.196745		0.128553	0.118394		0.0649526	0.0460339
H.CAG struct Glutamine	percentage of CAG in alpha helix	sequence features	Expected protein secondary structure	negative COD		0.282863	0.20697		0.209171	0.180623		0.231917	0.198035		0.163794	0.108048		0.0836397	0.0969514
H.CAU struct Histidine	percentage of CAU in alpha helix	sequence features	Expected protein secondary structure	funny structure COD		0.165243	0.222498		0.169237	0.131346		0.107933	0.0874112		0.0737341	0.0556819		0.0604522	0.0565831
H.CCA struct Proline	percentage of CCA in alpha helix	sequence features	Expected protein secondary structure	funny structure COD		0.0749181	0.111607		0.130323	0.118203		0.137126	0.132888		0.151691	0.209251		0.0875748	0.0754426
H.CCC struct Proline	percentage of CCC in alpha helix	sequence features	Expected protein secondary structure	funny structure COD		0.202308	0.146396		0.154136	0.108462		0.189847	0.154207		0.158348	0.155642		0.154994	0.104153
H.CCG struct Proline	percentage of CCG in alpha helix	sequence features	Expected protein secondary structure	funny structure COD		0.136795	0.0836211		0.100382	0.0849896		0.102056	0.105369		0.131521	0.131966		0.116428	0.104823
H.CCU struct Proline	percentage of CCU in alpha helix	sequence features	Expected protein secondary structure	funny structure COD		0.115786	0.0959906		0.172689	0.112893		0.156227	0.154724		0.113269	0.0798506		0.128316	0.0783012
H.CGA struct Arginine	percentage of CGA in alpha helix	sequence features	Expected protein secondary structure	positive COD		0.135965	0.0808316		0.127704	0.0719928		0.113876	0.176893		0.0846365	0.0698958		0.0344847	0.0363496
H.CGC struct Arginine	percentage of CGC in alpha helix	sequence features	Expected protein secondary structure	positive COD		0.416422	0.288655		0.178365	0.135533		0.135908	0.176944		0.207032	0.126534		0.0598731	0.0454167
H.CGG struct Arginine	percentage of CGG in alpha helix	sequence features	Expected protein secondary structure	positive COD		0.439915	0.301535		0.160187	0.137039		0.185207	0.209515		0.137171	0.114773		0.0640773	0.0646366
H.CGU struct Arginine	percentage of CGU in alpha helix	sequence features	Expected protein secondary structure	positive COD		0.200512	0.0663266		0.0920032	0.0577526		0.12999	0.0737475		0.0697039	0.0741669		0.0431397	0.0280111
H.CUA struct Leucine	percentage of CUA in alpha helix	sequence features	Expected protein secondary structure	Lsmall hydro COD		0.129557	0.0713686		0.0841585	0.159566		0.12431	0.0462812		0.0795654	0.0959619		0.0447778	0.0412817
H.CUC struct Leucine	percentage of CUC in alpha helix	sequence features	Expected protein secondary structure	Lsmall hydro COD		0.193434	0.146657		0.195387	0.152258		0.274161	0.336611		0.119969	0.153783		0.0673432	0.0776957
H.CUG struct Leucine	percentage of CUG in alpha helix	sequence features	Expected protein secondary structure	Lsmall hydro COD		0.235658	0.164734		0.230702	0.251567		0.268541	0.209367		0.158031	0.102865		0.100959	0.0774211
H.CUU struct Leucine	percentage of CUU in alpha helix	sequence features	Expected protein secondary structure	Lsmall hydro COD		0.117957	0.123807		0.133832	0.103999		0.205707	0.0956518		0.0845353	0.0865439		0.059728	0.0486074
H.GAA struct Glutamate	percentage of GAA in alpha helix	sequence features	Expected protein secondary structure	negative COD		0.183644	0.180603		0.162062	0.140607		0.37984	0.154946		0.128932	0.122479		0.0726749	0.0682939
H.GAC struct Aspartate	percentage of GAC in alpha helix	sequence features	Expected protein secondary structure	negative COD		0.324223	0.150222		0.192659	0.182708		0.299488	0.27189		0.201008	0.196203		0.0992704	0.0968302
H.GAG struct Glutamate	percentage of GAG in alpha helix	sequence features	Expected protein secondary structure	negative COD		0.441373	0.202995		0.343623	0.276978		0.305124	0.249432		0.179827	0.14532		0.105294	0.114764
H.GAU struct Aspartate	percentage of GAU in alpha helix	sequence features	Expected protein secondary structure	negative COD		0.313727	0.216948		0.157004	0.210809		0.264808	0.222915		0.146899	0.0833391		0.102914	0.124108
H.GCA struct Serine	percentage of GCA in alpha helix	sequence features	Expected protein secondary structure	Asmall hydro COD		0.232366	0.150277		0.237964	0.14754		0.163458	0.154834		0.132032	0.0937814		0.0625838	0.0915195
H.GCC struct Serine	percentage of GCC in alpha helix	sequence features	Expected protein secondary structure	Asmall hydro COD		0.318049	0.166025		0.418921	0.227383		0.271887	0.267204		0.164394	0.145233		0.0795829	0.086912
H.GCG struct Serine	percentage of GCG in alpha helix	sequence features	Expected protein secondary structure	Asmall hydro COD		0.658749	0.299265		0.135218	0.127536		0.129905	0.160236		0.145451	0.139506		0.0910791	0.0870532
H.GCU struct Serine	percentage of GCU in alpha helix	sequence features	Expected protein secondary structure	Asmall hydro COD		0.232397	0.126221		0.203331	0.174685		0.220607	0.150836		0.262804	0.225697		0.0759144	0.0754226
H.GGA struct Glycine	percentage of GGA in alpha helix	sequence features	Expected protein secondary structure	others		0.256789	0.224073		0.19708	0.149962		0.152798	0.11959		0.120162	0.107238		0.0692006	0.0722223
H.GGC struct Glycine	percentage of GGC in alpha helix	sequence features	Expected protein secondary structure	others		0.257742	0.219918		0.313925	0.253589		0.209508	0.179056		0.24155	0.154582		0.107069	0.144208
H.GGG struct Glycine	percentage of GGG in alpha helix	sequence features	Expected protein secondary structure	others		0.301173	0.272745		0.195024	0.160388		0.18082	0.168747		0.167554	0.127244		0.123689	0.0647948
H.GGU struct Glycine	percentage of GGU in alpha helix	sequence features	Expected protein secondary structure	others		0.172194	0.0968466		0.172931	0.108431		0.191052	0.160532		0.11682	0.062839		0.064152	0.056969
H.GUA struct Valine	percentage of GUA in alpha helix	sequence features	Expected protein secondary structure	small hydro COD		0.0932357	0.0366368		0.0745625	0.0779814		0.0809443	0.0801541		0.0544483	0.0659329		0.0430831	0.0403783
H.GUC struct Valine	percentage of GUC in alpha helix	sequence features	Expected protein secondary structure	small hydro COD		0.190561	0.12559		0.20457	0.164716		0.285464	0.194735		0.142718	0.138561		0.0547848	0.0635394
H.GUG struct Valine	percentage of GUG in alpha helix	sequence features	Expected protein secondary structure	small hydro COD		0.224647	0.157011		0.256683	0.211017		0.267597	0.20308		0.182058	0.191427		0.089467	0.107233
H.GUU struct Valine	percentage of GUU in alpha helix	sequence features	Expected protein secondary structure	small hydro COD		0.110117	0.0982989		0.0709585	0.113924		0.127544	0.102427		0.0843577	0.055991		0.0341573	0.0507105
H.UAC struct Tyrosine	percentage of UAC in alpha helix	sequence features	Expected protein secondary structure	others		0.208102	0.106554		0.144359	0.135567		0.204719	0.139911		0.152185	0.159297		0.0569698	0.0657679
H.UAU struct Tyrosine	percentage of UAU in alpha helix	sequence features	Expected protein secondary structure	others		0.210787	0.106899		0.101387	0.108071		0.179159	0.163909		0.106614	0.0689472		0.0477816	0.0375929
H.UCA struct Serine	percentage of UCA in alpha helix	sequence features	Expected protein secondary structure	phosphor COD		0.0914137	0.0657308		0.122252	0.0647563		0.0970353	0.0817582		0.0786952	0.0567473		0.0675751	0.0699352
H.UCC struct Serine	percentage of UCC in alpha helix	sequence features	Expected protein secondary structure	phosphor COD		0.532188	0.285395		0.251579	0.2574		0.416463	0.347203		0.149156	0.0791477		0.0678707	0.0685478
H.UCG struct Serine	percentage of UCG in alpha helix	sequence features	Expected protein secondary structure	phosphor COD		0.0962421	0.119517		0.120134	0.122709		0.113357	0.130398		0.0832605	0.0792087		0.0522049	0.0429145
H.UCU struct Serine	percentage of UCU in alpha helix	sequence features	Expected protein secondary structure	phosphor COD		0.150657	0.09788		0.152527	0.126032		0.144623	0.158533		0.35652	0.426809		0.0641602	0.0571213
H.UGC struct Cysteine	percentage of UGC in alpha helix	sequence features	Expected protein secondary structure	funny structure COD		0.205624	0.114679		0.105367	0.126984		0.172371	0.109675		0.0945321	0.0932821		0.0441573	0.0409781
H.UGG struct Tryptophan	percentage of UGG in alpha helix	sequence features	Expected protein secondary structure	funny structure COD		0.170055	0.132685		0.407404	0.713856		0.114086	0.0962508		0.0935992	0.114818		0.0523269	0.0601595
H.UGU struct Cysteine	percentage of UGU in alpha helix	sequence features	Expected protein secondary structure	funny structure COD		0.100844	0.087969		0.0787176	0.0743886		0.138483	0.0897129		0.0645607	0.042737		0.0553144	0.0339737
H.UUA struct Leucine	percentage of UUA in alpha helix	sequence features	Expected protein secondary structure	Lsmall hydro COD		0.0714895	0.0501301		0.0920461	0.0485758		0.105817	0.0715605		0.0506793	0.0314684		0.0456649	0.0355522
H.UUC struct Phenylalanine	percentage of UUC in alpha helix	sequence features	Expected protein secondary structure	others		0.246874	0.190174		0.184156	0.197034		0.329028	0.598294		0.123698	0.101772		0.0745738	0.0962358
H.UUG struct Leucine	percentage of UUG in alpha helix	sequence features	Expected protein secondary structure	Lsmall hydro COD		0.148398	0.122047		0.12511	0.120995		0.324441	0.272727		0.127702	0.116068		0.0595444	0.0508813
H.UUU struct Phenylalanine	percentage of UUU in alpha helix	sequence features	Expected protein secondary structure	others		0.122653	0.0929116		0.154269	0.111994		0.118761	0.13777		0.116981	0.0718014		0.0540038	0.0785764
Coil.C..	Percentage of total amino acids in Coil-coil	sequence features	Expected protein secondary structure	others		0.23678	0.194156		0.2149	0.165087		0.26431	0.215183		0.259234	0.296685		0.126716	0.177341
ExtendedBetaSheet.E..	Percentage of total amino acids in Beta Sheet	sequence features	Expected protein secondary structure	others		0.219761	0.12211		0.177417	0.163365		0.275985	0.219622		0.802218	0.584916		0.754111	0.597043
AlphaHelix.H..	Percentage of total amino acids in Alpha helix	sequence features	Expected protein secondary structure	others		0.223549	0.126157		0.165133	0.12958		0.245329	0.170033		0.191058	0.177934		0.122916	0.129521
CA.	percentage of A in coiled-coil	sequence features	Expected protein secondary structure	Asmall hydro AA		0.81526	1.25661		0.411542	0.639915		0.443062	0.311692		0.336874	0.321272		0.117679	0.103914
CC.	percentage of C in coiled-coil	sequence features	Expected protein secondary structure	funny structure AA		0.211813	0.187734		0.594858	0.290574		0.242947	0.200356		1.83326	0.433266		2.20023	1.04561
CD.	percentage of D in coiled-coil	sequence features	Expected protein secondary structure	negative AA		0.992865	0.683823		0.371928	0.253196		0.3696	0.285553		0.327964	0.678265		0.161611	0.232934
CE.	percentage of E in coiled-coil	sequence features	Expected protein secondary structure	negative AA		0.345481	0.218894		0.392965	0.254811		0.31884	0.394409		0.542995	0.727914		0.276901	0.239231
CF.	percentage of F in coiled-coil	sequence features	Expected protein secondary structure	others		0.305196	0.185348		0.202403	0.28706		0.330657	0.313887		0.514149	0.716309		0.310105	0.402233
CG.	percentage of G in coiled-coil	sequence features	Expected protein secondary structure	others		0.360748	0.181515		0.39847	0.280775		0.242473	0.247155		0.265489	0.284217		0.142108	0.223267
CH.	percentage of H in coiled-coil	sequence features	Expected protein secondary structure	funny structure AA		0.250778	0.147048		0.317658	0.266113		0.228941	0.222308		0.364193	0.360245		0.853869	0.277602
CI.	percentage of I in coiled-coil	sequence features	Expected protein secondary structure	small hydro AA		0.941855	0.387488		0.280011	0.347139		0.380478	0.38217		0.324668	0.230547		0.179758	0.203614
CK.	percentage of K in coiled-coil	sequence features	Expected protein secondary structure	positive AA		0.305443	0.355113		0.410995	0.38886		0.517691	0.453411		0.357837	0.277361		0.262984	0.352238
CL.	percentage of L in coiled-coil	sequence features	Expected protein secondary structure	Lsmall hydro AA		0.335524	0.197714		0.322382	0.285153		0.564175	0.279433		0.284202	0.35454		0.222774	0.262524
CM.	percentage of M in coiled-coil	sequence features	Expected protein secondary structure	others		0.304106	0.252062		0.291917	0.228391		0.417022	0.642175		1.27064	1.33719		0.827255	1.37878
CN.	percentage of N in coiled-coil	sequence features	Expected protein secondary structure	negative AA		0.497801	0.255547		0.316099	0.189323		0.324714	0.329747		0.294923	0.282178		0.142087	0.14891
CP.	percentage of P in coiled-coil	sequence features	Expected protein secondary structure	funny structure AA		0.19655	0.135727		0.279611	0.194349		0.343605	0.299326		0.328265	0.416822		0.171282	0.236253
CQ.	percentage of Q in coiled-coil	sequence features	Expected protein secondary structure	negative AA		0.339818	0.220827		0.453691	0.274397		0.330351	0.273555		0.389922	0.429457		0.406176	0.431758
CR.	percentage of R in coiled-coil	sequence features	Expected protein secondary structure	positive AA		0.284397	0.223903		0.53431	0.45512		0.401133	0.296407		0.252965	0.239743		0.148392	0.113368
CS.	percentage of S in coiled-coil	sequence features	Expected protein secondary structure	phosphor AA		0.294753	0.212027		0.294438	0.159371		0.267844	0.302042		1.73822	2.23714		0.415025	0.435172
CT.	percentage of T in coiled-coil	sequence features	Expected protein secondary structure	phosphor AA		0.227464	0.176998		0.274232	0.408735		0.377026	0.562585		0.459787	0.299528		0.230521	0.260772
CV.	percentage of V in coiled-coil	sequence features	Expected protein secondary structure	small hydro AA		0.402615	0.350441		0.265261	0.275349		0.328413	0.321616		0.29001	0.239124		0.225278	0.214461
CW.	percentage of W in coiled-coil	sequence features	Expected protein secondary structure	funny structure AA		0.484868	0.253582		0.157845	0.12602		0.369595	0.201603		1.83483	2.31026		6.01898	4.46222
CY.	percentage of Y in coiled-coil	sequence features	Expected protein secondary structure	others		0.363815	0.246728		0.285336	0.230262		0.291329	0.20112		0.352278	0.348704		0.521962	0.41887
EA.	percentage of A in extended beta sheet	sequence features	Expected protein secondary structure	Asmall hydro AA		0.313349	0.140626		0.227023	0.161933		0.20237	0.161778		0.366662	0.269262		0.906691	0.472589
EC.	percentage of C in extended beta sheet	sequence features	Expected protein secondary structure	funny structure AA		0.173941	0.184033		0.158102	0.138585		0.200405	0.149568		0.317669	0.204289		1.51031	0.317645
ED.	percentage of D in extended beta sheet	sequence features	Expected protein secondary structure	negative AA		0.173412	0.0570802		0.108782	0.132612		0.172602	0.205346		0.885571	0.43205		0.498632	1.20898
EE.	percentage of E in extended beta sheet	sequence features	Expected protein secondary structure	negative AA		0.148017	0.10449		0.230739	0.165525		0.264168	0.222787		0.568893	0.740529		0.763001	0.952905
EF.	percentage of F in extended beta sheet	sequence features	Expected protein secondary structure	others		0.188189	0.192502		0.186061	0.175051		0.314093	0.383813		0.357014	0.27732		0.23438	0.322717
EG.	percentage of G in extended beta sheet	sequence features	Expected protein secondary structure	others		0.40558	0.207095		0.154748	0.146497		0.192402	0.160782		0.223378	0.331879		0.368064	0.45863
EH.	percentage of H in extended beta sheet	sequence features	Expected protein secondary structure	funny structure AA		0.141883	0.101379		0.126589	0.160557		0.252282	0.199627		0.680405	0.256378		1.93111	1.27346
EI.	percentage of I in extended beta sheet	sequence features	Expected protein secondary structure	small hydro AA		0.214624	0.0930157		0.437105	0.253734		0.253394	0.27003		0.361789	0.235029		0.282941	0.261244
EK.	percentage of K in extended beta sheet	sequence features	Expected protein secondary structure	positive AA		0.162582	0.15447		0.360045	0.188336		0.243937	0.289602		0.414725	0.413139		0.319031	0.248091
EL.	percentage of L in extended beta sheet	sequence features	Expected protein secondary structure	Lsmall hydro AA		0.264469	0.124011		0.201497	0.198744		0.320216	0.247271		0.28032	0.229129		0.207128	0.20454
EM.	percentage of M in extended beta sheet	sequence features	Expected protein secondary structure	others		0.220347	0.163205		0.132968	0.122648		0.257656	0.144888		0.531219	0.54283		1.95994	0.83493
EN.	percentage of N in extended beta sheet	sequence features	Expected protein secondary structure	negative AA		0.191906	0.0990701		0.194315	0.178654		0.160207	0.177198		0.383845	0.506979		0.611559	2.21518
EP.	percentage of P in extended beta sheet	sequence features	Expected protein secondary structure	funny structure AA		0.306596	0.415004		0.0826663	0.0782065		0.154337	0.102661		1.43571	0.284876		2.99532	4.14012
EQ.	percentage of Q in extended beta sheet	sequence features	Expected protein secondary structure	negative AA		0.176788	0.159564		0.193535	0.137965		0.297102	0.176517		1.02398	0.510456		1.01415	0.897812
ER.	percentage of R in extended beta sheet	sequence features	Expected protein secondary structure	positive AA		0.271294	0.143422		0.218214	0.185408		0.509632	0.382005		0.392662	0.328529		0.296336	0.249972
ES.	percentage of S in extended beta sheet	sequence features	Expected protein secondary structure	phosphor AA		0.167102	0.161725		0.168943	0.159257		0.226629	0.168783		0.592416	0.29174		2.78757	0.619654
ET.	percentage of T in extended beta sheet	sequence features	Expected protein secondary structure	phosphor AA		0.202577	0.190019		0.234411	0.192319		0.219763	0.182284		0.32023	0.252469		0.649809	0.251929
EV.	percentage of V in extended beta sheet	sequence features	Expected protein secondary structure	small hydro AA		0.25943	0.158063		0.23411	0.123664		0.291024	0.15788		0.829643	0.452736		0.329711	0.432669
EW.	percentage of W in extended beta sheet	sequence features	Expected protein secondary structure	funny structure AA		0.109862	0.0935251		0.142437	0.175136		0.176507	0.144062		0.467182	0.31879		0.544445	1.02683
EY.	percentage of Y in extended beta sheet	sequence features	Expected protein secondary structure	others		0.163604	0.139634		0.199393	0.193398		0.275943	0.191222		0.244357	0.230933		0.188527	0.163205
HA.	percentage of A in alpha helix	sequence features	Expected protein secondary structure	Asmall hydro AA		1.19183	0.532968		0.448568	0.231193		0.263755	0.195221		0.407005	0.30106		0.131346	0.133214
HC.	percentage of C in alpha helix	sequence features	Expected protein secondary structure	funny structure AA		0.286663	0.159255		0.589899	0.34088		0.213756	0.180276		1.5398	1.0527		3.13871	3.84734
HD.	percentage of D in alpha helix	sequence features	Expected protein secondary structure	negative AA		0.399073	0.267393		0.335457	0.275558		0.406842	0.322148		0.201659	0.308481		0.12445	0.1102
HE.	percentage of E in alpha helix	sequence features	Expected protein secondary structure	negative AA		0.34036	0.300235		0.292354	0.238109		0.240624	0.158243		0.241268	0.280763		0.125281	0.14272
HF.	percentage of F in alpha helix	sequence features	Expected protein secondary structure	others		0.286898	0.212277		0.353237	0.316588		0.31458	0.235979		0.21654	0.316387		0.140785	0.0960746
HG.	percentage of G in alpha helix	sequence features	Expected protein secondary structure	others		0.422682	0.238398		0.265782	0.249457		0.229755	0.335938		0.770672	0.476444		1.35277	0.466224
HH.	percentage of H in alpha helix	sequence features	Expected protein secondary structure	funny structure AA		0.353754	0.197357		0.335331	0.230551		0.244886	0.216543		0.664089	0.7384		0.704258	1.21234
HI.	percentage of I in alpha helix	sequence features	Expected protein secondary structure	small hydro AA		0.257362	0.392279		0.238221	0.21329		0.301374	0.217422		0.193559	0.19455		0.1271	0.109993
HK.	percentage of K in alpha helix	sequence features	Expected protein secondary structure	positive AA		0.257669	0.252707		0.293089	0.180499		0.482658	0.332011		0.250343	0.251493		0.100576	0.100258
HL.	percentage of L in alpha helix	sequence features	Expected protein secondary structure	Lsmall hydro AA		0.281203	0.244881		0.369233	0.259911		0.270587	0.194527		0.171768	0.185694		0.146796	0.173983
HM.	percentage of M in alpha helix	sequence features	Expected protein secondary structure	others		0.254413	0.179127		0.235866	0.219994		0.383362	0.417811		0.22475	0.345252		0.145376	0.221015
HN.	percentage of N in alpha helix	sequence features	Expected protein secondary structure	negative AA		0.304332	0.234304		0.28167	0.198604		0.28057	0.200845		0.759597	0.537876		1.43611	1.25957
HP.	percentage of P in alpha helix	sequence features	Expected protein secondary structure	funny structure AA		0.237097	0.24781		0.350612	0.244008		0.277246	0.2254		0.330829	0.339798		1.1047	0.451329
HQ.	percentage of Q in alpha helix	sequence features	Expected protein secondary structure	negative AA		0.436786	0.398024		0.256396	0.361701		0.282814	0.257115		0.418876	0.332292		0.197933	0.213673
HR.	percentage of R in alpha helix	sequence features	Expected protein secondary structure	positive AA		0.361975	0.242827		0.598495	0.444305		0.299459	0.313251		0.200501	0.179039		0.140812	0.116635
HS.	percentage of S in alpha helix	sequence features	Expected protein secondary structure	phosphor AA		0.271677	0.289198		0.319638	0.261954		0.253632	0.207187		0.292877	0.33254		0.168872	0.171355
HT.	percentage of T in alpha helix	sequence features	Expected protein secondary structure	phosphor AA		0.207548	0.138263		0.224798	0.180973		0.464633	0.301627		0.235661	0.300915		0.18756	0.204527
HV.	percentage of V in alpha helix	sequence features	Expected protein secondary structure	small hydro AA		0.310572	0.185546		0.267309	0.237449		0.236298	0.220204		0.359099	0.593998		0.132155	0.125161
HW.	percentage of W in alpha helix	sequence features	Expected protein secondary structure	funny structure AA		0.28381	0.214041		0.285121	0.391575		0.256871	0.219088		1.03169	1.74494		1.4594	1.94285
HY.	percentage of Y in alpha helix	sequence features	Expected protein secondary structure	others		0.23353	0.239824		0.257211	0.182357		0.276488	0.225333		0.386944	0.279355		0.127326	0.176353
X.length	protein length	sequence features	Size and atom composition	MW-L		0.623264	0.332567		3.76869	3.86046		0.523204	0.504293
X.pI	Isolelectric point	sequence features	Hydrophobicity and charges	pI		3.7519	2.96744		0.697963	0.682797		0.914413	2.22765		0.52874	0.551713		0.386025	0.525829
X.mw	Molecular Weight	sequence features	Size and atom composition	MW-L		0.624337	0.436598		4.27115	6.43539		0.589692	0.472994
X.negativeAA	Percentage of negative amino acids only	sequence features	Hydrophobicity and charges	negative AA		2.17153	1.47016		2.01202	2.65633		0.686759	0.572927
X.positiveAA	Percentage of positive amino acids only	sequence features	Hydrophobicity and charges	positive AA		0.529106	0.225858		2.98705	3.07485		0.301548	0.200627
X.GRAVY	Grand Average of Hydropathy - The GRAVY value for a peptide or protein is calculated as the sum ofÊhydropathy valuesÊ[9] of all the amino acids, divided by the number of residues in the sequence.ÊÊ	sequence features	Hydrophobicity and charges	others		1.01258	0.550829		0.258001	0.310212		0.316052	0.201351		0.897837	1.02849		0.117866	0.164057
X.Aliphatic_index	Aliphatic Index	sequence features	Hydrophobicity and charges	others		0.251943	0.207558		0.265696	0.285409		0.337371	0.288633		0.316731	0.230092		0.101213	0.0783135
GC_Codons	Percentage of GC	sequence features	Others	AU_GC		0.200782	0.392561		0.203413	0.163431		1.71114	3.61326		0.202163	0.179295		0.109439	0.0823889
AU_Codons	Percentage of AU	sequence features	Others	AU_GC		0.221323	0.392823		0.219922	0.191066		1.86666	2.55931		0.246932	0.233294		0.118241	0.111367
NT.A	Ala at the N-ter	sequence features	N-end residue	Asmall hydro AA		0.0329307	0.0481502		0.0848252	0.0375538		0.0197322	0.0252491		0.0400056	0.0291852		0.0102794	0.0163664
NT.C	Cys at the N-ter	sequence features	N-end residue	PothersAA		0.0171328	0.00125358			0.000918988		0.000223211	0.00109786		0.00129822	1.57475e-06		0.000368162	0.000194407
NT.D	Asp at the N-ter	sequence features	N-end residue	negative AA		0.0015371	0.00277549		0.00731825	0.00985602		0.030418	0.0121182		0.00443474	0.000699085		0.00468015	0.000974095
NT.E	Glu at the N-ter	sequence features	N-end residue	negative AA		0.00817342	0.00627103		0.00518953	0.00277398		0.0245817	0.00270983		0.0090723	0.00116694		0.00475757	0.00787429
NT.F	Phe at the N-ter	sequence features	N-end residue	others		0.00342147	0.000209004		0.000112566	3.12225e-05		0.00046916	0.00205333		0.00319737	0.00326272		0.000868291	0.000241986
NT.G	Gly at the N-ter	sequence features	N-end residue	others		0.00660764	0.0136933		0.03322	0.00414517		0.0344068	0.0178575		0.0122505	0.0108402		0.00769146	0.0101577
NT.H	His at the N-ter	sequence features	N-end residue	PothersAA		0.00799617	0.000242896		0.0006155	6.28766e-05		0.00017222	0.000330522		0.000309153	0.00675795		0.000329511	0.000161253
NT.I	Ile at the N-ter	sequence features	N-end residue	small hydro AA		1.79486e-05	4.28436e-05		0.000102023	0.000332219		0.000310804	0.0028934		0.00289825	0.000929893		0.00126131	0.00382229
NT.K	Lys at the N-ter	sequence features	N-end residue	positive AA		0.00725999	0.0019901		0.0115159	0.00484525		0.0444321	0.00482088		0.00470483	0.00398854		0.00352307	0.00121622
NT.L	Leu at the N-ter	sequence features	N-end residue	Lsmall hydro AA		0.0940983	0.07122		0.009597	0.0085014		0.00906861	0.0227033		0.0112354	0.0132043		0.00710582	0.000886571
NT.M	Met at the N-ter	sequence features	N-end residue	others		0.00356222	0.00540858		0.0177262	0.000603828		0.00404105	0.00543815		0.00849887	0.0170997		4.5227e-05	0.00212559
NT.N	Asn at the N-ter	sequence features	N-end residue	negative AA		0.00527756	0.0183997		0.00345902	0.00247088		0.0196438	0.00642012		0.00239163	0.00478253		0.00518476	0.00614022
NT.P	Pro at the N-ter	sequence features	N-end residue	PothersAA		0.00175977	0.00103236		0.00558206	0.00407963		0.0128954	0.00572425		0.00532576	0.0143733		0.0034813	0.0110418
NT.Q	Gln at the N-ter	sequence features	N-end residue	negative AA		0.00522083	0.000876009		0.00316228	0.000876397		0.00446924	0.000131167		0.00557661	0.00161564		0.00104041	0.000155118
NT.R	Arg at the N-ter	sequence features	N-end residue	positive AA		0.184334	0.0545458		0.00152444	0.0112705		0.0112348	0.00105376		0.00542743	0.00320028		0.00194075	0.0027295
NT.S	Ser at the N-ter	sequence features	N-end residue	phosphor AA		0.0183528	0.012663		0.0197765	0.0109867		0.0130047	0.0174263		0.013684	0.0118111		0.007051	0.0041294
NT.T	Thr at the N-ter	sequence features	N-end residue	phosphor AA		0.015036	0.0111211		0.00798078	0.00608704		0.0286354	0.00443028		0.00601493	0.00279793		0.00326845	0.00211525
NT.V	Val at the N-ter	sequence features	N-end residue	small hydro AA		0.00252398	0.00671046		0.00969421	0.00599505		0.00412894	0.00226837		0.00721089	0.115824		0.00710136	0.00241154
NT.W	Trp at the N-ter	sequence features	N-end residue	PothersAA		0.00623115	0.00259054		0.00235477	0.00284462		0.00344785	0.00077961		0.00496627	0.00243709		0.000970172	0.00161084
NT.Y	Tyr at the N-ter	sequence features	N-end residue	others		0.0338291	0.00669748			0.00218842		8.48834e-05	0.000349111		0.00182664	1.48479e-05		0.000117628	0.000253643
protein.binding	gene onthology descriptor protein.binding	other features	Others	others			0.0485956			0.0394882			0.430173			0.00743978			0.0285227
poly.A..RNA.binding	gene onthology descriptor poly.A..RNA.binding	other features	Others	others			0.107402			0.0265349			0.00663538			0.00907846			0.00927586
ATP.binding	gene onthology descriptor ATP.binding	other features	Others	others			0.0170493			0.0179977			0.0696105			0.0077473			0.027391
molecular_function	gene onthology descriptor molecular_function	other features	Others	others			0.0121379			0.0121184			0.0281856			0.0112757			0.0137102
metal.ion.binding	gene onthology descriptor metal.ion.binding	other features	Others	others			0.00814595			0.0106773			0.00546749			0.0175046			0.012049
GTP.binding	gene onthology descriptor GTP.binding	other features	Others	others			0.0568168			0.0161415			0.00696816			0.00579769			0.00122661
protein.homodimerization.activity	gene onthology descriptor protein.homodimerization.activity	other features	Others	others			0.0039683			0.0119518			0.00521462			0.0108821			0.00466377
identical.protein.binding	gene onthology descriptor identical.protein.binding	other features	Others	others			0.0120371			0.0170623			0.00169296			0.0062455			0.00569193
GTPase.activity	gene onthology descriptor GTPase.activity	other features	Others	others			0.0565517			0.0172409			0.00442328			0.00222596			0.00266084
protein.kinase.binding	gene onthology descriptor protein.kinase.binding	other features	Others	others			0.00664135			0.0198941			0.167926			0.00751459			0.00846889
zinc.ion.binding	gene onthology descriptor zinc.ion.binding	other features	Others	others			0.00874077			0.0077252			0.0055139			0.000635222			0.00243917
calcium.ion.binding	gene onthology descriptor calcium.ion.binding	other features	Others	others			0.000567725			0.0296824			0.0250888			0.00786964			0.0149068
protein.domain.specific.binding	gene onthology descriptor protein.domain.specific.binding	other features	Others	others			0.0313046			0.0626216			0.00252236			0.00136877			0.00836188
enzyme.binding	gene onthology descriptor enzyme.binding	other features	Others	others			0.000995002			0.0116754			0.0216329			0.00235979			0.006971
protein.complex.binding	gene onthology descriptor protein.complex.binding	other features	Others	others			0.0147638			0.0540213			0.0132002			0.00167261			0.000197891
actin.binding	gene onthology descriptor actin.binding	other features	Others	others			0.00535127			0.00933198			0.00255989			0.0586951			0.0237149
nucleotide.binding	gene onthology descriptor nucleotide.binding	other features	Others	others			0.000444186			0.00530097			0.00671578			0.00324677			0.000149573
RNA.binding	gene onthology descriptor RNA.binding	other features	Others	others			8.1117e-05			0.000244246			0.0154184			0.00187101			0.00190389
ubiquitin.protein.ligase.binding	gene onthology descriptor ubiquitin.protein.ligase.binding	other features	Others	others			0.00980541			0.00788459			0.0228164			0.000633574			0.000756019
structural.constituent.of.ribosome	gene onthology descriptor structural.constituent.of.ribosome	other features	Others	others			0.0139236			0.000347623			0.570694			0.00319614			0.00453823
protein.heterodimerization.activity	gene onthology descriptor protein.heterodimerization.activity	other features	Others	others			0.00156157			0.0054464			0.00718916			0.0287947			0.000133271
protein.serine.threonine.kinase.activity	gene onthology descriptor protein.serine.threonine.kinase.activity	other features	Others	others			0.00148341			0.00340742			0.00520342			0.0289303			0.000345027
calmodulin.binding	gene onthology descriptor calmodulin.binding	other features	Others	others			0.00369351			0.0869823			0.0434476			0.0195565			0.0142452
DNA.binding	gene onthology descriptor DNA.binding	other features	Others	others			0.0031697			0.000481529			0.0309497			0.213106			0.00488066
GTPase.activator.activity	gene onthology descriptor GTPase.activator.activity	other features	Others	others			0.0104846			0.00332078			0.00292809			0.00920504			0.00613686
protein.C.terminus.binding	gene onthology descriptor protein.C.terminus.binding	other features	Others	others			0.00286996			0.036776			0.0117376			0.000132624			0.000761294
magnesium.ion.binding	gene onthology descriptor magnesium.ion.binding	other features	Others	others			0.00133213			0.00241075			0.116041			0.000923338			0.000414868
receptor.binding	gene onthology descriptor receptor.binding	other features	Others	others			0.00195535			5.43423e-05			0.000303558			0.00540006			0.000621642
actin.filament.binding	gene onthology descriptor actin.filament.binding	other features	Others	others			0.0396273			0.00228345			0.00260912			0.00532867			0.0179751
microtubule.binding	gene onthology descriptor microtubule.binding	other features	Others	others			0.0103654			0.0140841			0.0120414			0.00618551			0.000655835
unfolded.protein.binding	gene onthology descriptor unfolded.protein.binding	other features	Others	others			0.00478963			0.00425691			0.00412389			0.000248884			0.00217707
ATPase.activity	gene onthology descriptor ATPase.activity	other features	Others	others			0.0015348			0.0326146			0.00630283			0.00477125			0.000227359
signal.transducer.activity	gene onthology descriptor signal.transducer.activity	other features	Others	others			0.0861145			0.000537414			4.58584e-05			0.00235266			0.00082703
SH3.domain.binding	gene onthology descriptor SH3.domain.binding	other features	Others	others			0.0718498			0.00251474			0.00062419			0.00904107			0.00137761
GDP.binding	gene onthology descriptor GDP.binding	other features	Others	others			0.00326574			0.00184798			0.000121915			0.00167487			0.000116796
ion.channel.binding	gene onthology descriptor ion.channel.binding	other features	Others	others			0.00315339			0.0104294			0.0013551			0.00667624			0.00244747
protein.kinase.activity	gene onthology descriptor protein.kinase.activity	other features	Others	others			0.000359557			4.89499e-05			0.000263227			0.000860937			0.000669669
chaperone.binding	gene onthology descriptor chaperone.binding	other features	Others	others			0.000397858			0.00720361			0.00817494			0.00117639			1.8018e-05
structural.molecule.activity	gene onthology descriptor structural.molecule.activity	other features	Others	others			0.181794			0.00370016			0.0127536			0.000102038			0.0101277
mRNA.binding	gene onthology descriptor mRNA.binding	other features	Others	others			0.000128082			0.000806084			0.0078442			0.0151136			0.000495196
kinase.binding	gene onthology descriptor kinase.binding	other features	Others	others			0.00136718			0.00678887			0.000225109			0.000807598			0.000219498
protein.N.terminus.binding	gene onthology descriptor protein.N.terminus.binding	other features	Others	others			0.00383113			0.00261698			0.0100588			7.02406e-05			0.000494899
chromatin.binding	gene onthology descriptor chromatin.binding	other features	Others	others			5.10181e-05			1.30698e-05			0.0169524			2.07759e-05			0.000827102
transcription.factor.binding	gene onthology descriptor transcription.factor.binding	other features	Others	others			0.00195439			0.00884986			0.00170604			0.0124625			0.000321458
structural.constituent.of.cytoskeleton	gene onthology descriptor structural.constituent.of.cytoskeleton	other features	Others	others			0.313009			0.0295002			0.000399373			0.000687009			0.0011856
translation.initiation.factor.activity	gene onthology descriptor translation.initiation.factor.activity	other features	Others	others			3.18989e-06			0.000407959			0.00219728			0.00103762			6.74988e-05
carbohydrate.binding	gene onthology descriptor carbohydrate.binding	other features	Others	others			3.65199e-05			2.28039e-06			0.0148219			0.00600989			0.00222026
endopeptidase.activity	gene onthology descriptor endopeptidase.activity	other features	Others	others			0			0.000201007			3.2131e-05			0.0214058			0.000599681
lipid.binding	gene onthology descriptor lipid.binding	other features	Others	others			0.0567765			0.026095			0.001746			0.000462232			4.36545e-06
ligase.activity	gene onthology descriptor ligase.activity	other features	Others	others			0.0013318			1.99325e-05			0.00256357			0.00181237			0.125812
syntaxin.binding	gene onthology descriptor syntaxin.binding	other features	Others	others			0			0.005969			0.0230302			0.0114936			0.00133591
NAD.binding	gene onthology descriptor NAD.binding	other features	Others	others			0.0986821			0.00455743			0.00146893			0.000230377			5.72332e-05
pyridoxal.phosphate.binding	gene onthology descriptor pyridoxal.phosphate.binding	other features	Others	others			0.0257641			0.025224			0.0118066			0.000321666			0.000561375
ubiquitin.protein.transferase.activity	gene onthology descriptor ubiquitin.protein.transferase.activity	other features	Others	others			1.39314e-07			0.00310033			0.000436373			0.00218907			0.0633676
double.stranded.RNA.binding	gene onthology descriptor double.stranded.RNA.binding	other features	Others	others			0.00509131			0.00271506			0.00565223			0.00185322			0.00017918
protein.transporter.activity	gene onthology descriptor protein.transporter.activity	other features	Others	others			0.00316838			0.0189746			2.94389e-06			0.000344008			0.001277
phospholipid.binding	gene onthology descriptor phospholipid.binding	other features	Others	others			0.00059239			0.000462379			0.0030893			0.0106162			0.000244964
drug.binding	gene onthology descriptor drug.binding	other features	Others	others			0.00201292			1.7741e-05			0.0472899			1.25005e-05			0.00426434
NADH.dehydrogenase..ubiquinone..activity	gene onthology descriptor NADH.dehydrogenase..ubiquinone..activity	other features	Others	others			0.102948			0.00182482			4.9986e-06			0.00787568			0.00134699
oxidoreductase.activity	gene onthology descriptor oxidoreductase.activity	other features	Others	others			0.00294792			0.0146192			0.000458065			0.00173644			0.000102698
Rab.GTPase.binding	gene onthology descriptor Rab.GTPase.binding	other features	Others	others			0.000962612			9.16913e-05			0.000227182			0.00656199			0.00199884
Rac.GTPase.binding	gene onthology descriptor Rac.GTPase.binding	other features	Others	others			0.00014481			1.21229e-08						0.00116241			0.00888952
flavin.adenine.dinucleotide.binding	gene onthology descriptor flavin.adenine.dinucleotide.binding	other features	Others	others			0.00247826			5.26818e-05			0.00129953			1.31417e-05			0.0001244
transcription.coactivator.activity	gene onthology descriptor transcription.coactivator.activity	other features	Others	others			0			0.000590088			6.83157e-05			0.000572008			7.72327e-05
ATPase.binding	gene onthology descriptor ATPase.binding	other features	Others	others			0.00928048						0.00252308			0.000108936			4.87641e-05
phosphoprotein.binding	gene onthology descriptor phosphoprotein.binding	other features	Others	others			0.057752			0.0175881			0.00690347			0.000260139			2.81671e-05
glycoprotein.binding	gene onthology descriptor glycoprotein.binding	other features	Others	others			0.000251254			0.00144477			0.000399668			0.00532513			5.0331e-06
peptidase.activity	gene onthology descriptor peptidase.activity	other features	Others	others			0.000929579			0.000783166			1.19045e-08			5.68609e-05			0.0005564
PDZ.domain.binding	gene onthology descriptor PDZ.domain.binding	other features	Others	others			0.00287154			0.0127448			0.000856835			2.76913e-05			0.000185771
calcium.dependent.protein.binding	gene onthology descriptor calcium.dependent.protein.binding	other features	Others	others			0.00933744			0.000603704			0.00290293			3.90743e-05			1.94589e-05
protein.serine.threonine.phosphatase.activity	gene onthology descriptor protein.serine.threonine.phosphatase.activity	other features	Others	others			0.000146761			0.00452525			0.000166349			0.000210739			1.59957e-06
phosphatidylinositol.4.5.bisphosphate.binding	gene onthology descriptor phosphatidylinositol.4.5.bisphosphate.binding	other features	Others	others			0.00196674			0.000505701						4.9692e-07			5.01441e-05
cytoskeletal.protein.binding	gene onthology descriptor cytoskeletal.protein.binding	other features	Others	others			0.00913947						9.44824e-05			7.87297e-06			0.000213835
protein.kinase.C.binding	gene onthology descriptor protein.kinase.C.binding	other features	Others	others			1.92311e-05			2.73609e-05			0.0191789			0.0601105			0.00306964
cell.adhesion.molecule.binding	gene onthology descriptor cell.adhesion.molecule.binding	other features	Others	others			1.31087e-07			0.00453726			0.00650215			0.000382263			0.00241636
phosphoprotein.phosphatase.activity	gene onthology descriptor phosphoprotein.phosphatase.activity	other features	Others	others			5.89769e-06			0.00153612			1.23543e-05			0.000314435			8.16272e-05
ubiquitin.protein.ligase.activity	gene onthology descriptor ubiquitin.protein.ligase.activity	other features	Others	others			6.66554e-05			9.48862e-05			0.000383327			4.94681e-05			0.000497165
heat.shock.protein.binding	gene onthology descriptor heat.shock.protein.binding	other features	Others	others			4.14444e-06			0.000298374						0.000109698			0.000154526
catalytic.activity	gene onthology descriptor catalytic.activity	other features	Others	others			0.0325132			6.49605e-07			0.00312211			0.00103859			3.37368e-05
SNARE.binding	gene onthology descriptor SNARE.binding	other features	Others	others			0.020961			0.00216355			0.0473183			3.56971e-05			0.000383717
hydrolase.activity	gene onthology descriptor hydrolase.activity	other features	Others	others			0.0174798			1.01846e-06			0.0548316			4.17848e-05			1.96815e-05
threonine.type.endopeptidase.activity	gene onthology descriptor threonine.type.endopeptidase.activity	other features	Others	others			1.1536e-05			1.21822e-05			2.46059e-05			0.0161399			5.22114e-05
ribosome.binding	gene onthology descriptor ribosome.binding	other features	Others	others			0.000140039						0.00486211			0.000796364			1.89098e-05
heme.binding	gene onthology descriptor heme.binding	other features	Others	others			0.000319796			0.000302668			0.0253072			0.000249734			0.000169052
electron.carrier.activity	gene onthology descriptor electron.carrier.activity	other features	Others	others			0.00407325			6.82139e-06			0.00223083			0.0280108			0.000310537
protein.phosphatase.binding	gene onthology descriptor protein.phosphatase.binding	other features	Others	others			0									4.31531e-05			4.1691e-08
tubulin.binding	gene onthology descriptor tubulin.binding	other features	Others	others			0.00942038			0.000328982			0.00156016			0.00365948			1.981e-07
protein.tyrosine.phosphatase.activity	gene onthology descriptor protein.tyrosine.phosphatase.activity	other features	Others	others			0.0111164			1.14184e-05			3.58116e-05			7.13369e-05			0.000385534
integrin.binding	gene onthology descriptor integrin.binding	other features	Others	others			2.17517e-05			2.56601e-05			0.000272289			1.44192e-06			0.000153912
protein.dimerization.activity	gene onthology descriptor protein.dimerization.activity	other features	Others	others			0.0105707			0.00739781			1.02625e-05			0.00070245			0.00149685
transporter.activity	gene onthology descriptor transporter.activity	other features	Others	others			5.10765e-05			1.57183e-05			9.03256e-09			0.00070284			7.87803e-05
protease.binding	gene onthology descriptor protease.binding	other features	Others	others			0			3.0545e-05			0.00119839			7.0184e-05			1.04368e-06
sequence.specific.DNA.binding.transcription.factor.activity	gene onthology descriptor sequence.specific.DNA.binding.transcription.factor.activity	other features	Others	others			0.00259725			5.25254e-05			1.82784e-05			0.0103778			1.7711e-05
ATP.dependent.RNA.helicase.activity	gene onthology descriptor ATP.dependent.RNA.helicase.activity	other features	Others	others			0.00174334			2.77124e-06			2.81422e-06			0.000149911			2.27163e-07
GTPase.binding	gene onthology descriptor GTPase.binding	other features	Others	others			0.0611071			1.3558e-06			2.6633e-05			0.00107677			0.000238842
scaffold.protein.binding	gene onthology descriptor scaffold.protein.binding	other features	Others	others			0.00388338						1.40021e-05			0.00560037
metallopeptidase.activity	gene onthology descriptor metallopeptidase.activity	other features	Others	others			0.00262783			0.00306862						9.36707e-05			0.00100296
peptide.binding	gene onthology descriptor peptide.binding	other features	Others	others			2.48429e-07						0.00020831			0.000157969			2.55052e-05
myosin.V.binding	gene onthology descriptor myosin.V.binding	other features	Others	others			0						1.61103e-09			0.00034398			0.000365084
ubiquitin.specific.protease.activity	gene onthology descriptor ubiquitin.specific.protease.activity	other features	Others	others			5.3135e-05						4.34643e-06			0.00160436			1.41159e-05
clathrin.binding	gene onthology descriptor clathrin.binding	other features	Others	others			0			0.000111918			0.0259302			0.00947184			0.000369776
biological_process	gene onthology descriptor biological_process	other features	Others	others			0.00858079			0.0329413			0.00632514			0.00960971			0.00607396
metabolic.process	gene onthology descriptor metabolic.process	other features	Others	others			0.650869			0.0135531			0.0116992			0.00367675			0.00616378
oxidation.reduction.process	gene onthology descriptor oxidation.reduction.process	other features	Others	others			0.039611			0.00306406			0.0425921			0.0351413			0.00662921
transcription..DNA.templated	gene onthology descriptor transcription..DNA.templated	other features	Others	others			0.0012714			0.00795979			0.00458819			0.00294035			0.00197048
protein.transport	gene onthology descriptor protein.transport	other features	Others	others			0.000904528			0.00777416			0.00646672			0.00837			0.00793834
intracellular.protein.transport	gene onthology descriptor intracellular.protein.transport	other features	Others	others			0.00345193			0.015847			0.00826645			0.000597172			0.00197158
positive.regulation.of.GTPase.activity	gene onthology descriptor positive.regulation.of.GTPase.activity	other features	Others	others			0.0181444			0.0189523			0.00583049			0.111661			0.0836719
negative.regulation.of.apoptotic.process	gene onthology descriptor negative.regulation.of.apoptotic.process	other features	Others	others			0.000411875			0.0170667			0.00629096			0.00778873			0.00330913
protein.phosphorylation	gene onthology descriptor protein.phosphorylation	other features	Others	others			0.00413308			0.000387249			0.0353541			0.0205167			0.00269733
apoptotic.process	gene onthology descriptor apoptotic.process	other features	Others	others			0.00955063			0.00235973			0.00498965			0.012914			0.000504592
translation	gene onthology descriptor translation	other features	Others	others			0.0129209			0.00311256			0.374595			0.0142237			0.00703675
positive.regulation.of.transcription.from.RNA.polymerase.II.promoter	gene onthology descriptor positive.regulation.of.transcription.from.RNA.polymerase.II.promoter	other features	Others	others			3.82723e-05			0.00808099			0.00972901			0.00538265			0.00183153
intracellular.signal.transduction	gene onthology descriptor intracellular.signal.transduction	other features	Others	others			0.00200387			0.00360903			0.00453574			0.0032843			0.00262866
regulation.of.transcription..DNA.templated	gene onthology descriptor regulation.of.transcription..DNA.templated	other features	Others	others			0.00233683			0.000442215			0.00538318			0.000704668			0.00151571
response.to.drug	gene onthology descriptor response.to.drug	other features	Others	others			0.0209441			0.00732647			0.00239498			0.00596533			0.000276841
actin.cytoskeleton.organization	gene onthology descriptor actin.cytoskeleton.organization	other features	Others	others			0.00521843			0.000394764			0.00984291			0.0127631			0.00442625
signal.transduction	gene onthology descriptor signal.transduction	other features	Others	others			0.000712219			0.000197056			0.00244367			0.000996284			0.000500072
endocytosis	gene onthology descriptor endocytosis	other features	Others	others			0.102583			0.0148968			0.00340649			0.00200762			0.000383766
cell.adhesion	gene onthology descriptor cell.adhesion	other features	Others	others			0.00815284			9.17132e-05			0.00552234			0.00590203			0.00123395
vesicle.mediated.transport	gene onthology descriptor vesicle.mediated.transport	other features	Others	others			0.00119015			0.00146913			0.00715755			0.000987737			0.00190891
brain.development	gene onthology descriptor brain.development	other features	Others	others			0.000950619			0.000727537			0.0142589			0.00244349			0.000110637
protein.folding	gene onthology descriptor protein.folding	other features	Others	others			0.00437527			0.002241			0.000901907			0.000551912			0.000272542
proteolysis	gene onthology descriptor proteolysis	other features	Others	others			0.0213261			0.00175314			0.00101625			0.00113569			0.000621726
mRNA.processing	gene onthology descriptor mRNA.processing	other features	Others	others			5.70931e-05			0.00191168			0.00661182			0.000887282			0.000226504
positive.regulation.of.cell.proliferation	gene onthology descriptor positive.regulation.of.cell.proliferation	other features	Others	others			0.00476547			0.00436623			0.0060534			0.00227779			0.000413099
cell.division	gene onthology descriptor cell.division	other features	Others	others			0.0298324			0.00949294			0.00532809			0.000897394			0.000317072
negative.regulation.of.transcription..DNA.templated	gene onthology descriptor negative.regulation.of.transcription..DNA.templated	other features	Others	others			0.0046458			0.0155909			0.00196674			0.000687679			0.000333469
negative.regulation.of.transcription.from.RNA.polymerase.II.promoter	gene onthology descriptor negative.regulation.of.transcription.from.RNA.polymerase.II.promoter	other features	Others	others			0.000725786			0.00113466			0.00314751			0.0281174			0.00222703
small.GTPase.mediated.signal.transduction	gene onthology descriptor small.GTPase.mediated.signal.transduction	other features	Others	others			0.00486864			0.00411651			0.0013087			0.0244784			0.00395791
neuron.projection.development	gene onthology descriptor neuron.projection.development	other features	Others	others			0.00993393			0.000403258			0.00366006			0.016954			0.00101623
positive.regulation.of.apoptotic.process	gene onthology descriptor positive.regulation.of.apoptotic.process	other features	Others	others			0.00133523			4.51544e-05			0.035933			0.000446927			0.00299475
synaptic.transmission	gene onthology descriptor synaptic.transmission	other features	Others	others			0.00091429			0.000367146			0.0121825			0.0128339			0.00728751
nervous.system.development	gene onthology descriptor nervous.system.development	other features	Others	others			0.00944977			0.0140446			0.00406501			0.00285049			0.000264799
proteasome.mediated.ubiquitin.dependent.protein.catabolic.process	gene onthology descriptor proteasome.mediated.ubiquitin.dependent.protein.catabolic.process	other features	Others	others			8.44615e-05			0.00248465			0.00039095			0.00770305			2.80447e-05
RNA.splicing	gene onthology descriptor RNA.splicing	other features	Others	others			6.17155e-05			1.42541e-05			0.000263098			0.000738625			4.21459e-05
cell.cycle	gene onthology descriptor cell.cycle	other features	Others	others			0.058756			0.0101531			0.00340496			0.00225047			8.93833e-05
cell.differentiation	gene onthology descriptor cell.differentiation	other features	Others	others			0.000780621			0.00106022			0.00390011			0.0152338			0.0079774
response.to.oxidative.stress	gene onthology descriptor response.to.oxidative.stress	other features	Others	others			0.00497866			0.00293782			0.000289754			0.00251269			0.000179387
negative.regulation.of.neuron.apoptotic.process	gene onthology descriptor negative.regulation.of.neuron.apoptotic.process	other features	Others	others			0.00549269			0.0111583			0.0264072			0.000268612			0.00479597
cell.proliferation	gene onthology descriptor cell.proliferation	other features	Others	others			0.00380451			0.000473527			0.0174118			0.0202393			8.5349e-05
cell.migration	gene onthology descriptor cell.migration	other features	Others	others			0.00188522			0.000951811			0.000480592			0.000637253			0.00112132
exocytosis	gene onthology descriptor exocytosis	other features	Others	others			0.00552723			0.00323562			0.000845736			0.0202653			0.00327179
protein.homooligomerization	gene onthology descriptor protein.homooligomerization	other features	Others	others			0.00352718			0.00453037			0.000271578			0.000677006			1.91683e-06
regulation.of.cell.shape	gene onthology descriptor regulation.of.cell.shape	other features	Others	others			0.0167551			8.40417e-07			0.00185716			0.00250998			0.000762304
G.protein.coupled.receptor.signaling.pathway	gene onthology descriptor G.protein.coupled.receptor.signaling.pathway	other features	Others	others			0.0558231			0.000113407			0.000898395			0.00303908			0.00413977
positive.regulation.of.gene.expression	gene onthology descriptor positive.regulation.of.gene.expression	other features	Others	others			3.22618e-05			0.0481016			0.000110156			0.00187376			2.55925e-05
protein.stabilization	gene onthology descriptor protein.stabilization	other features	Others	others			0.00291165			9.52908e-06			0.00810536			0.000102955			0.000689875
Rab.protein.signal.transduction	gene onthology descriptor Rab.protein.signal.transduction	other features	Others	others			7.04291e-05			0.000525401			0.000142032			0.000662633			0.00280452
axonogenesis	gene onthology descriptor axonogenesis	other features	Others	others			0.00130004			0.00489825			0.000601491			0.00987276			0.000913447
mitotic.nuclear.division	gene onthology descriptor mitotic.nuclear.division	other features	Others	others			0.00326984			0.000211493			2.72948e-05			0.000249794			0.00049142
response.to.organic.cyclic.compound	gene onthology descriptor response.to.organic.cyclic.compound	other features	Others	others			0.00548708			0.000226627			0.00145668			0.000452701			0.000133618
aging	gene onthology descriptor aging	other features	Others	others			0.002094			0.00185712			0.000657931			0.000602645			0.000302194
transport	gene onthology descriptor transport	other features	Others	others			0.00501443			0.000290386			0.00656003			0.00275375			0.000868728
in.utero.embryonic.development	gene onthology descriptor in.utero.embryonic.development	other features	Others	others			1.77834e-06			0.000889671			1.3515e-05			2.97497e-05			3.76281e-05
protein.ubiquitination	gene onthology descriptor protein.ubiquitination	other features	Others	others			0.000286482			0.007084			0.000261539			0.00338061			0.00329399
response.to.hypoxia	gene onthology descriptor response.to.hypoxia	other features	Others	others			0.00181219			0.00345577			0.000143236			0.000763666			0.0126246
positive.regulation.of.transcription..DNA.templated	gene onthology descriptor positive.regulation.of.transcription..DNA.templated	other features	Others	others			0.000331115			0.00105349			0.00389382			0.00247355			0.000556975
spermatogenesis	gene onthology descriptor spermatogenesis	other features	Others	others			0.00214445			4.72103e-06			0.00307976			0.0176224			5.13899e-05
negative.regulation.of.cell.proliferation	gene onthology descriptor negative.regulation.of.cell.proliferation	other features	Others	others			3.68577e-05			0.00243716						0.000923998			1.18683e-05
positive.regulation.of.protein.phosphorylation	gene onthology descriptor positive.regulation.of.protein.phosphorylation	other features	Others	others			0.00231763			0.000215971			0.000135379			0.00210798			7.78189e-05
learning	gene onthology descriptor learning	other features	Others	others			0.0165836			1.42316e-05			0.00337639			0.00116385			0.00351991
cytoskeleton.organization	gene onthology descriptor cytoskeleton.organization	other features	Others	others			0.00415891						0.00233855			0.000610994			5.16761e-05
protein.autophosphorylation	gene onthology descriptor protein.autophosphorylation	other features	Others	others			9.07506e-05						0.017787			7.6868e-05			0.0013454
phosphorylation	gene onthology descriptor phosphorylation	other features	Others	others			0.00510025			0.000198033			0.00159332			0.00228807			1.84599e-06
Wnt.signaling.pathway	gene onthology descriptor Wnt.signaling.pathway	other features	Others	others			1.22167e-05			4.55837e-05			0.00707342			0.000983168			0.000119515
regulation.of.apoptotic.process	gene onthology descriptor regulation.of.apoptotic.process	other features	Others	others			2.41254e-06			2.31791e-07			1.7428e-05			0.000497831			0.0151033
response.to.ethanol	gene onthology descriptor response.to.ethanol	other features	Others	others			0.000953698			0.00983482			0.0013149			0.00197731			2.58058e-05
axon.guidance	gene onthology descriptor axon.guidance	other features	Others	others			0.161869			0.000842033			0.000336845			0.00217184			0.00300457
osteoblast.differentiation	gene onthology descriptor osteoblast.differentiation	other features	Others	others			0.0011819			0.00368734			0.00271655			2.13729e-05			0.00368505
retrograde.transport..endosome.to.Golgi	gene onthology descriptor retrograde.transport..endosome.to.Golgi	other features	Others	others			0.00107866						0.00109861			0.000436775			0.000192102
translational.initiation	gene onthology descriptor translational.initiation	other features	Others	others			5.1173e-05			1.09116e-06			0.000596937			0.00330483			0.00086824
neuromuscular.process.controlling.balance	gene onthology descriptor neuromuscular.process.controlling.balance	other features	Others	others			2.17957e-05			0.0309965			2.80434e-05			0.0121072			0.0019142
cell.redox.homeostasis	gene onthology descriptor cell.redox.homeostasis	other features	Others	others			0.00282069						0.000763076			0.0127139			5.73684e-05
dephosphorylation	gene onthology descriptor dephosphorylation	other features	Others	others			0.000316733			0.00180465			6.37213e-05			6.70944e-05			0.000270309
positive.regulation.of.cell.migration	gene onthology descriptor positive.regulation.of.cell.migration	other features	Others	others			4.87954e-06			0.000395479			0.000130319			0.00328071			0.00419573
cellular.response.to.DNA.damage.stimulus	gene onthology descriptor cellular.response.to.DNA.damage.stimulus	other features	Others	others			0			0.00301279			0.0187112			0.00656801			0.00314066
calcium.ion.transport	gene onthology descriptor calcium.ion.transport	other features	Others	others			0.0017742			0.0969255			0.0173156			0.0129792			0.0128158
tricarboxylic.acid.cycle	gene onthology descriptor tricarboxylic.acid.cycle	other features	Others	others			0.33702			0.0126015			0.00343453			8.97837e-05			0.000125865
protein.dephosphorylation	gene onthology descriptor protein.dephosphorylation	other features	Others	others			0.000313105			0.00210146			0.00293477						2.73302e-05
activation.of.mitophagy.in.response.to.mitochondrial.depolarization	gene onthology descriptor activation.of.mitophagy.in.response.to.mitochondrial.depolarization	other features	Others	others			0.00599225			0.00290427						9.99261e-06			0.000130546
neuron.migration	gene onthology descriptor neuron.migration	other features	Others	others			1.11571e-05			0.000244263			0.00081288			5.57139e-06			0.00047424
positive.regulation.of.neuron.projection.development	gene onthology descriptor positive.regulation.of.neuron.projection.development	other features	Others	others			0.0185187			0.00482867			0.0050873			0.000374857			0.000156412
response.to.organic.substance	gene onthology descriptor response.to.organic.substance	other features	Others	others			0.0059097			0.00310149			2.91323e-05			3.18263e-05			4.47589e-05
angiogenesis	gene onthology descriptor angiogenesis	other features	Others	others			5.21692e-09			0.000382782			3.92043e-05			1.66604e-05			5.65065e-07
regulation.of.gene.expression	gene onthology descriptor regulation.of.gene.expression	other features	Others	others			0.000714471			0.000222736			0.00605171			0.000388869			0.000127486
peptidyl.serine.phosphorylation	gene onthology descriptor peptidyl.serine.phosphorylation	other features	Others	others			1.63724e-05			0.000770906			0.0227287			0.00124024			0.00257211
regulation.of.exocytosis	gene onthology descriptor regulation.of.exocytosis	other features	Others	others			0.0228215			0.00635976			9.74359e-05			0.0380672			0.00017764
response.to.lipopolysaccharide	gene onthology descriptor response.to.lipopolysaccharide	other features	Others	others			0.000465653			0.000334496			2.42571e-06			0.000290365			0.000183419
response.to.toxic.substance	gene onthology descriptor response.to.toxic.substance	other features	Others	others			0.00125456			0.00287396			7.86969e-06			1.20649e-05			0.000233382
transmembrane.transport	gene onthology descriptor transmembrane.transport	other features	Others	others			0.0135284			0.000176075			0.000783839			0.000405211			4.4108e-05
regulation.of.cell.cycle	gene onthology descriptor regulation.of.cell.cycle	other features	Others	others			0.000939266			0.00579821			0.00222448			0.0204733			6.21456e-05
response.to.calcium.ion	gene onthology descriptor response.to.calcium.ion	other features	Others	others			5.86367e-05			0.00991925			0.0134747			5.27204e-05			0.000540111
long.term.synaptic.potentiation	gene onthology descriptor long.term.synaptic.potentiation	other features	Others	others			0.000623088			0.00284127			0.00677709			0.00141252			0.000489205
multicellular.organismal.development	gene onthology descriptor multicellular.organismal.development	other features	Others	others			0			2.66966e-05			0.00115478			0.00646264			1.77939e-06
protein.localization.to.plasma.membrane	gene onthology descriptor protein.localization.to.plasma.membrane	other features	Others	others			0.0479208			0.00128204			5.94825e-05			0.000291862			0.000471934
heart.development	gene onthology descriptor heart.development	other features	Others	others			0.000958095			0.00143494						6.29295e-05			1.78497e-05
neuron.projection.morphogenesis	gene onthology descriptor neuron.projection.morphogenesis	other features	Others	others			0.00304787			2.61349e-07						0.00140855			0.00374623
negative.regulation.of.gene.expression	gene onthology descriptor negative.regulation.of.gene.expression	other features	Others	others			0.00347889			0.000168475			3.64043e-05			0.00122923			7.49297e-07
locomotory.behavior	gene onthology descriptor locomotory.behavior	other features	Others	others			0.00107854			0.00257527			0.0407299			0.000115233			1.00665e-06
single.organismal.cell.cell.adhesion	gene onthology descriptor single.organismal.cell.cell.adhesion	other features	Others	others			5.00114e-07						0.00605996			0.000710528			0.000285231
protein.homotetramerization	gene onthology descriptor cytoplasm	other features	Others	others			0.0212985			0.00324124						1.68342e-06			7.13066e-05
PF00069	protein family descriptor Pkinase	other features	Others	others			7.77636e-05			0.00034001			0.0256787			0.0363823			0.0014105
PF00400	protein family descriptor WD40	other features	Others	others			0.000124765			0.0111789			0.000567926			0.0015061			0.002016
PF00071	protein family descriptor Ras	other features	Others	others			8.43705e-05			0.000227588			0.000393173			0.000749801			0.0143273
PF00076	protein family descriptor RRM_1	other features	Others	others			6.59772e-05			4.62652e-05			0.0092831			0.0031548			0.00542818
PF00168	protein family descriptor C2	other features	Others	others			0.00090279			0.00254152			0.000950537			0.00563055			0.000805549
PF00169	protein family descriptor PH	other features	Others	others			0			0.000220317			0.00195088			0.00417248			0.000171414
PF00595	protein family descriptor PDZ	other features	Others	others			7.6224e-05			0.00137738			0.000152118			0.015277			0.00139446
PF07679	protein family descriptor I-set	other features	Others	others			0.00094233			6.65534e-05			0.00103094			0.00173663			0.000407807
PF00307	protein family descriptor CH	other features	Others	others			0.00181847			0.00100913			2.47732e-05			0.133401			0.147461
PF13499	protein family descriptor EF-hand_7	other features	Others	others			0.00365036			0.00186661			0.0229032			0.0339367			0.00678984
PF12796	protein family descriptor Ank_2	other features	Others	others			0.00429439			0.000270321			0.000446968			0.107648			0.000212052
PF00018	protein family descriptor SH3_1	other features	Others	others			0.0240331			7.94477e-05			0.000166685			3.84961e-06			0.0010308
PF13895	protein family descriptor Ig_2	other features	Others	others			0.00348375			1.70635e-05			0.00149337			0.000232218			2.12345e-07
PF14604	protein family descriptor SH3_9	other features	Others	others			0.0608053			6.96712e-05			2.53511e-07			0.000350095			7.93711e-07
PF13414	protein family descriptor TPR_11	other features	Others	others			0.000446071			1.86642e-05			0.000281099			4.5726e-05			7.91071e-05
PF00041	protein family descriptor fn3	other features	Others	others			0.0184997						0.00032829			0.00206629			0.00876913
PF00227	protein family descriptor Proteasome	other features	Others	others			1.56202e-05						3.10556e-06			0.0165593			0.000201775
PF00004	protein family descriptor AAA	other features	Others	others			3.73907e-05			1.70758e-05			0.00402197			0.000903724			0.000104364
PF00153	protein family descriptor Mito_carr	other features	Others	others			0.00423727			0.00445837			0.0158082			1.72888e-06			9.76291e-06
PF00025	protein family descriptor Arf	other features	Others	others			1.06583e-05			0.00397445			0.000164117			0.00341703			0.0001901
PF00106	protein family descriptor adh_short	other features	Others	others			0.00784112			4.07953e-06			0.00455622			6.42072e-05			0.000128483
PF01399	protein family descriptor PCI	other features	Others	others			8.61839e-06			0.00170101			2.92831e-07						0.00434942
PF00226	protein family descriptor DnaJ	other features	Others	others			0.00263204			0.00160844						0.000127924			0.000325496
PF07653	protein family descriptor SH3_2	other features	Others	others			0.000706296			0.00100424			3.3321e-05			0.00313967
PF00515	protein family descriptor TPR_1	other features	Others	others			3.41458e-05						0.00103226			0.000627741			0.000615279
PF00270	protein family descriptor DEAD	other features	Others	others			0.000756137						2.83012e-05						0.000274428
PF00271	protein family descriptor Helicase_C	other features	Others	others			0.00158613			2.61008e-06						1.66655e-05			3.0009e-05
PF03144	protein family descriptor GTP_EFTU_D2	other features	Others	others			8.40209e-06			1.00416e-05			0.0029628			2.12969e-05			0.000683276
PF00625	protein family descriptor Guanylate_kin	other features	Others	others			0.000177865			7.21329e-10			0.000268405			0.000219875			5.51672e-05
PF00501	protein family descriptor AMP-binding	other features	Others	others			4.90812e-06			0.000140881			7.30273e-05			0.0012884			3.19551e-07
PF00009	protein family descriptor GTP_EFTU	other features	Others	others			0.000589432			0.000887876			0.00429574			1.58692e-05			2.01086e-07
PF00085	protein family descriptor Thioredoxin	other features	Others	others			1.23267e-07			0.0020778			1.35319e-07			0.0189161
PF00621	protein family descriptor RhoGEF	other features	Others	others			0.000198163			2.81433e-05			6.23386e-07			0.00964219			0.00134548
PF14259	protein family descriptor RRM_1	other features	Others	others			0.000141188						0.00236571
PF13855	protein family descriptor LRR_8	other features	Others	others			2.14416e-05						4.36655e-05			0.000652839			8.53413e-05
PF01602	protein family descriptor Adaptin_N	other features	Others	others			0.00121754			0.0322186			0.0025705			0.000174045			0.00542087
PF00130	protein family descriptor C1_1	other features	Others	others			0			0.000392211			0.00168958						7.34802e-06
PF07686	protein family descriptor V-set	other features	Others	others			0.00178246						0.00297348						1.64821e-05
PF00149	protein family descriptor Metallophos	other features	Others	others			7.84664e-05						0.000857727			0.000212324			2.58028e-06
PF03953	protein family descriptor Tubulin_C	other features	Others	others			0.171457			0.0298144			4.97744e-05			1.10192e-05			6.417e-06
PF00091	protein family descriptor Tubulin	other features	Others	others			0.248368			0.029865			1.56155e-05						0.00274951
PF13405	protein family descriptor EF-hand_6	other features	Others	others			5.78993e-05						0.0255953						0.000306332
PF01094	protein family descriptor ANF_receptor	other features	Others	others			0.00978237			5.85041e-06			0.00538784			0.00260199			0.000370922
PF00022	protein family descriptor Actin	other features	Others	others			0.0164446						2.34757e-06			0.000257837			2.83026e-05
PF00013	protein family descriptor KH_1	other features	Others	others			0			0.000386609			6.6366e-05
PF00412	protein family descriptor LIM	other features	Others	others			5.22835e-05			5.13918e-05			3.38055e-05
PF00373	protein family descriptor FERM_M	other features	Others	others			0.0453729			0.0261632			0.000127675			1.02719e-05
PF00240	protein family descriptor ubiquitin	other features	Others	others			9.66189e-06			0.00152026			8.74804e-06			0.000347775			0.000694533
PF00612	protein family descriptor IQ	other features	Others	others			0.0238076						0.000768861			0.0022228
PF00107	protein family descriptor ADH_zinc_N	other features	Others	others			0.000128929			0.00125451			0.00122679			0.000327801			2.26991e-06
PF00171	protein family descriptor Aldedh	other features	Others	others			0.00460709			0.00304228			0.000693199						3.12142e-05
cytoplasm	gene onthology descriptor cytoplasm	other features	Others	others			0.140363			0.0185738			0.0251133			0.03783			0.0117273
extracellular.exosome	gene onthology descriptor extracellular.exosome	other features	Others	others			0.0541422			0.583455			0.037			0.306345			0.0258237
nucleus	gene onthology descriptor nucleus	other features	Others	others			0.014072			0.0202154			0.0288987			0.0220672			0.0082615
membrane	gene onthology descriptor membrane	other features	Others	others			0.0754881			0.0159049			0.028953			0.0149586			0.0104117
mitochondrion	gene onthology descriptor mitochondrion	other features	Others	mitochondrion			9.17056			0.0361089			0.0751099			0.104199			0.0309257
plasma.membrane	gene onthology descriptor plasma.membrane	other features	Others	others			0.0919607			0.0304909			0.0371343			0.0342632			0.0162568
cytosol	gene onthology descriptor cytosol	other features	Others	others			0.0333625			0.0241948			0.0234877			0.0107534			0.0107121
nucleoplasm	gene onthology descriptor nucleoplasm	other features	Others	others			0.0125243			0.0210011			0.0152991			0.0126012			0.0125109
integral.component.of.membrane	gene onthology descriptor integral.component.of.membrane	other features	Others	others			0.0284773			0.0188623			0.0140107			0.0154524			0.0125226
focal.adhesion	gene onthology descriptor focal.adhesion	other features	Others	others			0.0307343			0.0472765			0.0144254			0.0363414			0.010119
perinuclear.region.of.cytoplasm	gene onthology descriptor perinuclear.region.of.cytoplasm	other features	Others	others			0.00231133			0.00809531			0.0395726			0.00284697			0.0034723
Golgi.apparatus	gene onthology descriptor Golgi.apparatus	other features	Others	others			0.00163472			0.00870893			0.00783289			0.00259866			0.00422622
myelin.sheath	gene onthology descriptor myelin.sheath	other features	Others	myelin			1.54721			10.9577			1.14495			0.00303326			0.00836517
endoplasmic.reticulum	gene onthology descriptor endoplasmic.reticulum	other features	Others	others			0.0777649			0.0062979			0.0161132			0.00830388			0.00203014
nucleolus	gene onthology descriptor nucleolus	other features	Others	others			0.00236096			0.00383407			0.0263719			0.00357136			0.0052216
cell.junction	gene onthology descriptor cell.junction	other features	Others	others			0.104052			0.0177337			0.0572286			0.0809182			0.00578636
mitochondrial.inner.membrane	gene onthology descriptor mitochondrial.inner.membrane	other features	Others	mitochondrion			8.10484			0.0662673			0.00595385			0.00445108			0.00770009
cellular_component	gene onthology descriptor cellular_component	other features	Others	others			0.00101086			0.0230952			0.00366973			0.0152387			0.00586459
neuron.projection	gene onthology descriptor neuron.projection	other features	Others	others			0.0296078			0.0680167			0.047923			0.00913716			0.0014261
protein.complex	gene onthology descriptor protein.complex	other features	Others	others			0.00975816			0.0149321			0.00915299			0.00424143			0.00508681
intracellular.membrane.bounded.organelle	gene onthology descriptor intracellular.membrane.bounded.organelle	other features	Others	others			0.0118575			0.016896			0.0016504			0.00649476			0.00520472
synapse	gene onthology descriptor synapse	other features	Others	others			0.0566221			0.0675067			0.106672			0.0117107			0.0171624
neuronal.cell.body	gene onthology descriptor neuronal.cell.body	other features	Others	others			0.00484031			0.00817143			0.065527			0.00931759			0.00196049
endoplasmic.reticulum.membrane	gene onthology descriptor endoplasmic.reticulum.membrane	other features	Others	others			0.0464716			0.00629567			0.00857258			0.00178735			0.000988037
dendrite	gene onthology descriptor dendrite	other features	Others	others			0.0379333			0.00579752			0.0466724			0.0142207			0.0125018
extracellular.space	gene onthology descriptor extracellular.space	other features	Others	others			0.0298328			0.0167974			0.0216579			0.00792941			0.00475127
axon	gene onthology descriptor axon	other features	Others	others			0.00547975			0.0197498			0.121534			0.00864878			0.00960198
centrosome	gene onthology descriptor centrosome	other features	Others	others			0.00778914			0.00384645			0.00484941			0.00252281			0.000647321
microtubule	gene onthology descriptor microtubule	other features	Others	others			0.0064897			0.0354647			0.0106253			0.00317585			0.00451138
intracellular	gene onthology descriptor intracellular	other features	Others	others			0.00104271			0.0100976			0.011138			0.00520559			0.00154314
cell.surface	gene onthology descriptor cell.surface	other features	Others	others			0.00294898			0.00554619			0.0101036			0.00566036			0.00217196
cytoskeleton	gene onthology descriptor cytoskeleton	other features	Others	others			0.00865916			0.0114179			0.0103532			0.013407			0.00803591
Golgi.membrane	gene onthology descriptor Golgi.membrane	other features	Others	others			0.00150992			0.00103032			0.00443998			0.000657482			0.00366978
mitochondrial.matrix	gene onthology descriptor mitochondrial.matrix	other features	Others	mitochondrion			0.717844			0.0131936			0.0168695			0.00146133			0.000483141
melanosome	gene onthology descriptor melanosome	other features	Others	others			0.00181281			0.0428203			0.0168349			0.00109152			0.000231308
postsynaptic.membrane	gene onthology descriptor postsynaptic.membrane	other features	Others	others			0.00616933			0.00211095			0.00616055			0.0104551			0.000486106
endosome	gene onthology descriptor endosome	other features	Others	others			0.0137302			0.00255011			0.000542029			0.000497235			0.00164173
ribonucleoprotein.complex	gene onthology descriptor ribonucleoprotein.complex	other features	Others	others			0.00385622			0.00629844			0.00301726			0.000378474			0.00230771
lamellipodium	gene onthology descriptor lamellipodium	other features	Others	others			0.00299151			0.000808664			0.0019645			0.00706181			0.00111439
integral.component.of.plasma.membrane	gene onthology descriptor integral.component.of.plasma.membrane	other features	Others	others			0.00607564			0.00254726			0.00641653			0.00260748			0.00449529
postsynaptic.density	gene onthology descriptor postsynaptic.density	other features	Others	others			0.00760252			0.000102159			0.00963216			0.00888976			0.00978045
cell.cell.junction	gene onthology descriptor cell.cell.junction	other features	Others	others			0.00145754			0.00786176			0.000245589			0.00211174			0.00265709
dendritic.spine	gene onthology descriptor dendritic.spine	other features	Others	others			0.0145878			0.00101693			0.0109819			0.0306286			0.000533194
actin.cytoskeleton	gene onthology descriptor actin.cytoskeleton	other features	Others	others			0.00195627			0.00335046			0.000759511			0.00537169			0.000649799
synaptic.vesicle	gene onthology descriptor synaptic.vesicle	other features	Others	others			0.49698			0.0368651			0.0109264			0.00521041			0.000180027
neuronal.postsynaptic.density	gene onthology descriptor neuronal.postsynaptic.density	other features	Others	others			0.00440244			0.129705			0.146576			0.0271144			0.00390128
early.endosome	gene onthology descriptor early.endosome	other features	Others	others			0.00194571			0.0024601			0.00221426			0.00293609			0.00193131
midbody	gene onthology descriptor midbody	other features	Others	others			0.0240596			0.00558312			0.000484523			0.00253776			0.000588943
lysosomal.membrane	gene onthology descriptor lysosomal.membrane	other features	Others	others			0.00217453			0.00452391			0.0287971			0.00110249			0.000860044
mitochondrial.outer.membrane	gene onthology descriptor mitochondrial.outer.membrane	other features	Others	mitochondrion			0.00675313			0.00230111			5.4111e-05			7.49908e-06			0.000304529
membrane.raft	gene onthology descriptor membrane.raft	other features	Others	others			0.00787605			0.00213797			0.00524756			0.00109826			0.00065109
apical.plasma.membrane	gene onthology descriptor apical.plasma.membrane	other features	Others	others			0.00461695			0.0244772			0.00615125			0.0179938			0.000844562
cell.cortex	gene onthology descriptor cell.cortex	other features	Others	others			0.00321121			0.00728851			0.000200717			0.119697			0.0115431
lysosome	gene onthology descriptor lysosome	other features	Others	others			9.89055e-05			0.00994135			0.00178822			0.00338546			0.000668569
vesicle	gene onthology descriptor vesicle	other features	Others	others			0.000178512			0.001658			0.000524417			0.00109398			0.000526525
nuclear.membrane	gene onthology descriptor nuclear.membrane	other features	Others	others			0.0447092			0.000758452			0.000603523			0.00695302			0.00404704
proteasome.complex	gene onthology descriptor proteasome.complex	other features	Others	others			0.00180927			0.00179791			0.00139819			0.00826804			0.000142361
growth.cone	gene onthology descriptor growth.cone	other features	Others	others			0.0252308			0.0177365			0.0103182			0.00876699			0.00617468
extracellular.region	gene onthology descriptor extracellular.region	other features	Others	others			0.000380635			0.00186802			0.0197981			0.00266342			0.00128809
trans.Golgi.network	gene onthology descriptor trans.Golgi.network	other features	Others	others			0.000620253			0.00496744			0.00506103			0.00353004			0.0269574
basolateral.plasma.membrane	gene onthology descriptor basolateral.plasma.membrane	other features	Others	others			0.0607323			0.0252942			0.00734376			0.00225545			0.00104357
microtubule.cytoskeleton	gene onthology descriptor microtubule.cytoskeleton	other features	Others	others			0.000237829			8.53503e-05			0.00207561			0.0220871			0.000298861
nuclear.speck	gene onthology descriptor nuclear.speck	other features	Others	others			0			0.000804463			0.000241999			2.41107e-06			0.000273744
cytosolic.large.ribosomal.subunit	gene onthology descriptor cytosolic.large.ribosomal.subunit	other features	Others	others			0.000140419			7.84326e-05			0.0222878			0.0209321			1.70147e-05
cytoplasmic.vesicle.membrane	gene onthology descriptor cytoplasmic.vesicle.membrane	other features	Others	others			0.00419305			0.253197			0.010601			0.00208536			0.0013385
endosome.membrane	gene onthology descriptor endosome.membrane	other features	Others	others			0.000328563			0.00016146			0.00316731			0.000430945			4.32527e-05
cell.body	gene onthology descriptor cell.body	other features	Others	others			0.0285373			0.00481143			0.00170156			0.000654638			0.000923704
cytoplasmic.membrane.bounded.vesicle	gene onthology descriptor cytoplasmic.membrane.bounded.vesicle	other features	Others	others			0.000429769			0.000600648			0.000226823			0.0120901			5.50552e-05
microtubule.organizing.center	gene onthology descriptor microtubule.organizing.center	other features	Others	others			0.00216615			0.000551509			0.00062666			7.90612e-05			0.0172294
late.endosome	gene onthology descriptor late.endosome	other features	Others	others			0.000228193			4.0884e-05			0.000440336			0.00275422			0.00255839
catalytic.step.2.spliceosome	gene onthology descriptor catalytic.step.2.spliceosome	other features	Others	others			0.00032877			0.000226711			0.000890998			0.000473044			0.00869436
Z.disc	gene onthology descriptor Z.disc	other features	Others	others			0.0130422			0.0067845			0.00153151			0.0796324			0.0849066
terminal.bouton	gene onthology descriptor terminal.bouton	other features	Others	others			0.0396478			0.0631648			0.096134			0.00045938			0.000343283
cytoplasmic.vesicle	gene onthology descriptor cytoplasmic.vesicle	other features	Others	others			0.00626433			0.0237422			0.0218			0.00104804			0.000461245
mitochondrial.respiratory.chain.complex.I	gene onthology descriptor mitochondrial.respiratory.chain.complex.I	other features	Others	mitochondrion			0.237869			0.00413049			0.00048707			0.0326992			0.000590925
recycling.endosome	gene onthology descriptor recycling.endosome	other features	Others	others			0.00121293			0.00371889			0.000129387			0.00023706			0.00365031
ruffle	gene onthology descriptor ruffle	other features	Others	others			0.000345056			0.00494468			0.00353179			0.00153729			0.00120791
cell.projection	gene onthology descriptor cell.projection	other features	Others	others			0.0318993			0.00199414			0.0030193			0.00133019			0.00111188
filopodium	gene onthology descriptor filopodium	other features	Others	others			0.00919733			0.00435132			0.00146782			0.00565121			0.00183821
nuclear.envelope	gene onthology descriptor nuclear.envelope	other features	Others	others			0.0773742			2.17512e-07			0.000272419			0.0708343			0.107675
spliceosomal.complex	gene onthology descriptor spliceosomal.complex	other features	Others	others			0.000270022			1.91055e-06			0.000332635			0.000365546			0.000732945
ruffle.membrane	gene onthology descriptor ruffle.membrane	other features	Others	others			0.000308197			3.71948e-05			0.000984518			0.00156312			9.24428e-07
peroxisome	gene onthology descriptor peroxisome	other features	Others	others			0.00191049			0.00064408			6.29323e-05			0.00261252			0.000359473
mitochondrial.membrane	gene onthology descriptor mitochondrial.membrane	other features	Others	mitochondrion			0.0124941			0.000169686			0.00353107			0.000101718			0.000808259
cytosolic.small.ribosomal.subunit	gene onthology descriptor cytosolic.small.ribosomal.subunit	other features	Others	others			0.00175377			7.03377e-05			0.0408549			0.000723934			0.000247434
spindle	gene onthology descriptor spindle	other features	Others	others			0.0368398			4.22508e-05			0.000433913			0.000678359			0.00330352
coated.pit	gene onthology descriptor coated.pit	other features	Others	others			0.0180649			0.0488075			0.000243954			0.00273116			0.000111238
extrinsic.component.of.membrane	gene onthology descriptor extrinsic.component.of.membrane	other features	Others	others			0.00867585			0.00596038			0.000147231			0.00492158			0.0013625
brush.border	gene onthology descriptor brush.border	other features	Others	others			0.00324822			0.000483459			0.000902725			0.0348766			0.0174761
mitochondrial.intermembrane.space	gene onthology descriptor mitochondrial.intermembrane.space	other features	Others	mitochondrion			6.35563e-05			0.000175608			0.00475052			0.000770744			0.00040635
endoplasmic.reticulum.Golgi.intermediate.compartment	gene onthology descriptor endoplasmic.reticulum.Golgi.intermediate.compartment	other features	Others	others			6.29581e-05			0.00133341			6.76809e-06			9.26848e-05			0.000285687
synaptic.vesicle.membrane	gene onthology descriptor synaptic.vesicle.membrane	other features	Others	others			0.113056			0.00930342			0.00372694			0.000228295			0.00018521
sarcolemma	gene onthology descriptor sarcolemma	other features	Others	others			0.00207321			0.00373737			0.00453165			0.0102626			0.0476909
COP9.signalosome	gene onthology descriptor COP9.signalosome	other features	Others	others			0.0193609			0.000286758			0.00220303			0.000474893			0.000113907
presynaptic.membrane	gene onthology descriptor presynaptic.membrane	other features	Others	others			0.00583448			0.00195267			0.0322807			0.00564648			7.63591e-05
early.endosome.membrane	gene onthology descriptor early.endosome.membrane	other features	Others	others			0.0154836			0.000655898			0.000245019						0.000116828
secretory.granule	gene onthology descriptor secretory.granule	other features	Others	others			4.29951e-05			0.00421027			0.0011032			8.02132e-05			0.000104104
endomembrane.system	gene onthology descriptor endomembrane.system	other features	Others	others			0.00243501			0.00176479			0.0496735			0.0066257			0.00211103
stress.fiber	gene onthology descriptor stress.fiber	other features	Others	others			0.0141555			0.00233565			2.3082e-06			0.0260234			0.00561724
cytoplasmic.ribonucleoprotein.granule	gene onthology descriptor cytoplasmic.ribonucleoprotein.granule	other features	Others	others			0.00189243			0.00020607			0.0015999			3.66476e-07			8.44327e-05
ribosome	gene onthology descriptor ribosome	other features	Others	others			0.000236405			0.00057451			0.00388068			0.000980813			0.000332779
