# Supplementary material for: The codon sequences predict protein lifetimes and other parameters of the protein life cycle in the mouse brain
Source: Sci Rep. 2018 Nov 15;8:16913. doi: 10.1038/s41598-018-35277-8 (PMC6237891; doi:10.1038/s41598-018-35277-8)
Supplement: Supplementary file 3 — Dataset 2 [file 41598_2018_35277_MOESM3_ESM.xlsx]

## Sheet: predictions_rs
	r	composition	composition and sequence features	composition, sequence and other features	maximum expected (data reproducibility)
	Protein lifetime	0.41	0.46	0.63	0.69
	Protein abundance	0.52	0.52	0.62	0.65
	mRNA abundance	0.55	0.54	0.54	0.64
	Ribosome density	0.77	0.77	0.74	0.8
	protein length	0.89	0.91	0.91	1
	r^2	composition	composition and sequence features	composition, sequence and other features	maximum expected (data reproducibility)
	Protein lifetime	0.17	0.21	0.39	0.48
	Protein abundance	0.27	0.27	0.38	0.42
	mRNA abundance	0.3	0.29	0.3	0.4
	Ribosome density	0.6	0.59	0.54	0.64
	protein length	0.79	0.84	0.83	1
