# Supplementary material for: The codon sequences predict protein lifetimes and other parameters of the protein life cycle in the mouse brain
Source: Sci Rep. 2018 Nov 15;8:16913. doi: 10.1038/s41598-018-35277-8 (PMC6237891; doi:10.1038/s41598-018-35277-8)
Supplement: Supplementary file 4 — Dataset 3 [file 41598_2018_35277_MOESM4_ESM.xlsx]

## Sheet: Sheet1
		Escherichia coli	Saccharomyces cerevisiae	Oryza sativa (rice)	Arabidopsis thaliana	Caenorhabditis elegans	Drosophila melanogaster	Danio rerio (zebrafish)	Rattus norvegicus	Homo sapiens	Mus Musculus	Human cell lines
	mRNA abundance	1	1	1,2	3	1,4	1,4	4	5–8	1,9–11	Fornasiero et al. and 11–13	14
	Translation rate	15	16	17	18	16	19	20	21	11	11	22
	Protein abundance	1	1	1	23	1	1	23	21,22	1,9,10	Fornasiero et al. and 24	25
1	Laurent, J. M. et al. Protein abundances are more conserved than mRNA abundances across diverse taxa. Proteomics 10, 4209–4212 (2010).
2	Childs, K. L., Davidson, R. M. & Buell, C. R. Gene coexpression network analysis as a source of functional annotation for rice genes. PLoS One 6, e22196 (2011).
3	Gan, X. et al. Multiple reference genomes and transcriptomes for Arabidopsis thaliana. Nature 477, 419–423 (2011).
4	Levin, M. et al. The mid-developmental transition and the evolution of animal body plans. Nature 531, 637–641 (2016).
5	Dobson, J. G., Fray, J., Leonard, J. L. & Pratt, R. E. Molecular mechanisms of reduced beta-adrenergic signaling in the aged heart as revealed by genomic profiling. Physiol. Genomics 15, 142–7 (2003).
6	Kadish, I. et al. Hippocampal and cognitive aging across the lifespan: a bioenergetic shift precedes and increased cholesterol trafficking parallels memory impairment. J. Neurosci. 29, 1805–16 (2009).
7	Buechel, H. M. et al. Deep sleep and parietal cortex gene expression changes are related to cognitive deficits with age. PLoS One 6, e18387 (2011).
8	Yu, Y. et al. A rat RNA-Seq transcriptomic BodyMap across 11 organs and 4 developmental stages. Nat. Commun. 5, 3230 (2014).
9	Kim, M.-S. et al. A draft map of the human proteome. Nature 509, 575–581 (2014).
10	Wilhelm, M. et al. Mass-spectrometry-based draft of the human proteome. Nature 509, 582–7 (2014).
11	Gonzalez, C. et al. Ribosome Profiling Reveals a Cell-Type-Specific Translational Landscape in Brain Tumors. J. Neurosci. 34, 10924–10936 (2014).
12	Bhave, S. V. et al. Gene array profiles of alcohol and aldehyde metabolizing enzymes in brains of C57BL/6 and DBA/2 mice. Alcohol. Clin. Exp. Res. 30, 1659–1669 (2006).
13	Zapala, M. a et al. Adult mouse brain gene expression patterns bear an embryologic imprint. Proc. Natl. Acad. Sci. U. S. A. 102, 10357–10362 (2005).
14	N. Nagaraj et al., Deep proteome and transcriptome mapping of a human cancer cell line. Mol. Syst. Biol. 7, 548 (2011).
15	Li, G. W., Burkhardt, D., Gross, C. & Weissman, J. S. Quantifying absolute protein synthesis rates reveals principles underlying allocation of cellular resources. Cell 157, 624–635 (2014).
16	Nedialkova, D. D. & Leidel, S. A. Optimization of Codon Translation Rates via tRNA Modifications Maintains Proteome Integrity. Cell 161, 1606–1618 (2015).
17	Park, S.-H. et al. Posttranscriptional Control of Photosynthetic mRNA Decay under Stress Conditions Requires 3’ and 5’ Untranslated Regions and Correlates with Differential Polysome Association in Rice. Plant Physiol. 159, 1111–1124 (2012).
18	Juntawong, P., Girke, T., Bazin, J. & Bailey-Serres, J. Translational dynamics revealed by genome-wide profiling of ribosome footprints in Arabidopsis. Proc. Natl. Acad. Sci. U. S. A. 111, E203-12 (2014).
19	Dunn, J. G., Foo, C. K., Belletier, N. G., Gavis, E. R. & Weissman, J. S. Ribosome profiling reveals pervasive and regulated stop codon readthrough in Drosophila melanogaster. Elife 2013, 1–32 (2013).
20	Housley, M. P. et al. Translational profiling through biotinylation of tagged ribosomes in zebrafish. Development 141, 3988–93 (2014).
21	Ori, A. et al. Integrated Transcriptome and Proteome Analyses Reveal Organ-Specific Proteome Deterioration in Old Rats. Cell Syst. 1, 224–237 (2015).
22	X. Lian et al., Genome-Wide and Experimental Resolution of Relative Translation Elongation Speed at Individual Gene Level in Human Cells. PLoS Genet. 12, 1–24 (2016).
23	Wang, M. et al. PaxDb, a Database of Protein Abundance Averages Across All Three Domains of Life. Mol. Cell. Proteomics 11, 492–500 (2012).
24	Sharma, K. et al. Cell type- and brain region-resolved mouse brain proteome. Nat. Neurosci. 18, 1819–31 (2015).
25	M. Beck et al., The quantitative proteome of a human cell line. Mol. Syst. Biol. 7, 549 (2011).
