# Supplementary material for: The codon sequences predict protein lifetimes and other parameters of the protein life cycle in the mouse brain
Source: Sci Rep. 2018 Nov 15;8:16913. doi: 10.1038/s41598-018-35277-8 (PMC6237891; doi:10.1038/s41598-018-35277-8)
Supplement: Supplementary file 5 — Dataset 4 [file 41598_2018_35277_MOESM5_ESM.xlsx]

## Sheet: DNA
	Sequence
0% optimized GC synuclein	ATGGATGTTTTTATGAAAGGACTTTCAAAAGCAAAAGAAGGAGTTGTTGCTGCTGCTGAAAAAACAAAACAAGGTGTAGCAGAAGCAGCTGGAAAAACAAAAGAAGGAGTTCTTTATGTAGGTTCAAAAACTAAAGAAGGAGTAGTTCATGGAGTTACAACAGTTGCAGAAAAAACAAAAGAACAAGTAACAAATGTTGGAGGAGCAGTAGTTACTGGTGTTACAGCAGTTGCTCAAAAAACAGTTGAAGGAGCTGGAAATATAGCTGCTGCAACTGGATTTGTAAAAAAAGATCAAATGGGAAAAGGTGAAGAAGGATATCCACAAGAAGGAATTCTTGAAGATATGCCTGTTGATCCTGGAAGTGAAGCATATGAAATGCCTTCAGAAGAAGGATAT…
25% optimized GC synuclein	ATGGATGTTTTTATGAAAGGACTTTCAAAAGCAAAAGAAGGAGTTGTTGCTGCTGCTGAGAAAACAAAGCAAGGCGTAGCAGAAGCGGCTGGAAAAACAAAAGAAGGAGTTCTTTATGTAGGTTCCAAGACCAAAGAGGGAGTAGTGCATGGAGTTACCACCGTGGCAGAAAAAACAAAAGAGCAAGTGACCAATGTTGGAGGCGCCGTGGTGACCGGTGTTACAGCCGTTGCTCAAAAAACAGTTGAAGGAGCGGGAAATATAGCTGCCGCAACTGGCTTCGTAAAAAAAGATCAAATGGGAAAAGGTGAAGAAGGATATCCACAAGAAGGAATCCTGGAAGATATGCCTGTGGATCCTGGATCGGAAGCATACGAAATGCCTTCAGAAGAAGGATAC…
50% optimized GC synuclein	ATGGATGTGTTCATGAAAGGACTTTCAAAGGCCAAGGAGGGAGTTGTGGCTGCTGCTGAGAAAACCAAGCAGGGTGTGGCAGAGGCAGCTGGAAAGACAAAAGAGGGAGTCCTCTATGTAGGTTCCAAAACTAAGGAAGGAGTGGTTCATGGAGTGACAACAGTGGCTGAGAAGACCAAAGAGCAAGTGACAAATGTTGGAGGAGCAGTGGTGACTGGTGTGACAGCAGTCGCTCAGAAGACAGTGGAGGGAGCTGGGAATATAGCTGCTGCCACTGGCTTTGTCAAGAAGGACCAGATGGGCAAGGGTGAGGAGGGGTACCCACAGGAAGGAATCCTGGAAGACATGCCTGTGGATCCTGGCAGTGAGGCTTATGAAATGCCTTCAGAGGAAGGCTAC…
75% optimized GC synuclein	ATGGACGTGTTCATGAAGGGCCTGTCCAAGGCCAAGGAGGGCGTGGTGGCGGCCGCGGAAAAGACCAAACAGGGTGTGGCCGAGGCAGCCGGGAAGACCAAGGAGGGCGTCCTCTACGTGGGCTCAAAAACTAAGGAAGGCGTGGTTCACGGCGTGACAACAGTTGCCGAGAAGACCAAGGAACAGGTAACAAACGTGGGCGGAGCAGTAGTTACTGGCGTGACCGCAGTCGCGCAGAAGACCGTGGAGGGCGCTGGGAACATCGCCGCTGCCACCGGATTTGTCAAGAAGGACCAGATGGGCAAGGGCGAGGAGGGGTACCCCCAGGAGGGCATTCTTGAGGACATGCCCGTTGACCCCGGCAGTGAGGCCTATGAGATGCCCTCCGAGGAGGGCTAT…
100% optimized GC synuclein	ATGGACGTGTTCATGAAGGGCCTGTCCAAGGCCAAGGAGGGCGTGGTGGCGGCCGCGGAGAAGACCAAGCAGGGCGTGGCCGAGGCGGCCGGGAAGACCAAGGAGGGCGTCCTCTACGTGGGCTCCAAGACCAAGGAGGGCGTGGTGCACGGCGTGACCACCGTGGCCGAGAAGACCAAGGAGCAGGTGACCAACGTGGGCGGCGCCGTGGTGACCGGCGTGACCGCCGTCGCGCAGAAGACCGTGGAGGGCGCGGGGAACATCGCCGCCGCCACCGGCTTCGTCAAGAAGGACCAGATGGGCAAGGGCGAGGAGGGGTACCCCCAGGAGGGCATCCTGGAGGACATGCCCGTGGACCCCGGCTCGGAGGCCTACGAGATGCCCTCCGAGGAGGGCTAC…
0% optimized GC SNAP-tag	GATAAAGATTGTGAAATGAAACGAACAACACTTGATAGTCCTCTTGGAAAACTTGAACTTTCTGGATGTGAACAAGGACTTCATCGTATAATTTTTCTTGGAAAAGGAACATCTGCAGCAGATGCAGTTGAAGTACCTGCACCAGCAGCAGTTCTAGGAGGACCAGAACCACTTATGCAAGCAACAGCATGGCTTAATGCATATTTTCATCAACCTGAAGCAATTGAAGAATTTCCTGTTCCAGCACTTCATCATCCAGTTTTTCAACAAGAAAGTTTTACACGACAAGTTCTTTGGAAACTTCTTAAAGTAGTTAAATTTGGAGAAGTAATTAGTTATAGTCATCTTGCAGCACTTGCAGGAAATCCAGCAGCAACAGCAGCAGTTAAAACAGCACTT…
25% optimized GC SNAP-tag	GATAAAGATTGTGAAATGAAGCGAACAACACTTGATAGTCCTCTTGGAAAGCTAGAGCTGTCTGGGTGTGAACAAGGACTTCATCGTATAATTTTTCTTGGAAAAGGAACATCTGCAGCCGATGCAGTTGAAGTACCTGCACCAGCCGCAGTTCTAGGAGGACCAGAACCACTGATGCAAGCCACAGCCTGGCTTAATGCATACTTTCACCAGCCTGAGGCAATCGAAGAATTTCCTGTTCCCGCCCTTCATCATCCAGTTTTTCAGCAAGAGAGTTTCACACGACAAGTTCTTTGGAAACTTCTTAAGGTAGTGAAATTTGGAGAAGTAATTAGTTATAGTCACCTGGCAGCACTTGCCGGAAATCCAGCAGCCACAGCCGCAGTTAAAACCGCCCTT…
50% optimized GC SNAP-tag	GACAAAGATTGCGAGATGAAACGCACAACCCTGGATAGCCCCCTGGGCAAACTGGAACTGTCTGGATGCGAACAAGGCCTTCACCGCATCATTTTTCTGGGCAAAGGCACATCGGCCGCCGACGCCGTGGAAGTACCTGCACCCGCAGCAGTGCTGGGAGGACCCGAGCCCCTGATGCAGGCAACAGCCTGGCTTAATGCATATTTTCACCAGCCCGAGGCCATTGAAGAATTCCCCGTTCCCGCCCTTCATCACCCAGTTTTCCAACAGGAATCGTTCACCCGCCAGGTTCTGTGGAAGCTGCTGAAGGTAGTTAAATTTGGCGAGGTCATTAGTTATTCGCACCTTGCCGCCCTGGCCGGCAATCCAGCAGCAACCGCCGCAGTTAAAACCGCCCTT…
75% optimized GC SNAP-tag	GACAAAGACTGCGAAATGAAGCGCACCACCCTGGATAGCCCTCTGGGCAAGCTGGAACTGTCTGGGTGCGAACAGGGCCTGCACCGTATCATCTTCCTGGGCAAAGGAACATCTGCCGCCGACGCCGTGGAAGTGCCTGCCCCAGCCGCCGTGCTGGGCGGACCAGAGCCACTGATGCAGGCCACCGCCTGGCTCAACGCCTACTTTCACCAGCCTGAGGCCATCGAGGAGTTCCCTGTGCCAGCCCTGCACCACCCAGTGTTCCAGCAGGAGAGCTTTACCCGCCAGGTGCTGTGGAAACTGCTGAAAGTGGTGAAGTTCGGAGAGGTCATCAGCTACAGCCACCTGGCCGCCCTGGCCGGCAATCCCGCCGCCACCGCCGCCGTGAAAACCGCCCTG…
100% optimized GC SNAP-tag	GACAAGGACTGCGAGATGAAGCGCACCACCCTGGACAGCCCCCTGGGCAAGCTGGAGCTGTCGGGGTGCGAGCAGGGCCTGCACCGCATCATCTTCCTGGGCAAGGGCACCTCGGCCGCCGACGCCGTGGAGGTGCCCGCCCCCGCCGCCGTGCTGGGCGGCCCCGAGCCCCTGATGCAGGCCACCGCCTGGCTCAACGCCTACTTCCACCAGCCCGAGGCCATCGAGGAGTTCCCCGTGCCCGCCCTGCACCACCCCGTGTTCCAGCAGGAGTCGTTCACCCGCCAGGTGCTGTGGAAGCTGCTGAAGGTGGTGAAGTTCGGCGAGGTCATCTCGTACTCGCACCTGGCCGCCCTGGCCGGCAACCCCGCCGCCACCGCCGCCGTGAAGACCGCCCTG…
0% optimized Cplx1	ATGGAATTTGTAATGAAACAAGCTCTAGGAGGAGCTACTAAAGATATGGGAAAAATGCTTGGAGGTGATGAAGAAAAAGATCCTGATGCTGCTAAAAAAGAAGAAGAACGACAAGAAGCACTACGACAAGCAGAAGAAGAACGTAAAGCAAAATATGCTAAAATGGAAGCAGAACGTGAAGTTATGCGACAAGGTATAAGAGATAAATATGGTATTAAAAAAAAAGAAGAACGTGAAGCTGAAGCTCAAGCAGCTATGGAAGCTAATTCAGAAGGTAGTCTAACTCGACCTAAAAAAGCTATTCCACCAGGTTGTGGTGATGAACCAGAAGAAGAAGATGAAAGTATTCTAGATACTGTTATTAAATATCTACCTGGACCACTACAAGATATGTTTAAA…
25% optimized Cplx1	ATGGAATTTGTAATGAAACAAGCTCTGGGAGGAGCTACCAAAGATATGGGGAAAATGCTTGGGGGTGATGAAGAGAAAGATCCTGACGCTGCTAAAAAGGAAGAAGAACGGCAAGAAGCACTGCGACAAGCAGAGGAAGAACGTAAGGCAAAATATGCCAAAATGGAAGCGGAACGTGAAGTCATGCGACAAGGCATAAGAGATAAGTATGGTATTAAGAAAAAAGAAGAGCGTGAAGCTGAGGCTCAAGCAGCCATGGAAGCTAACTCAGAAGGTAGCCTAACTCGACCCAAAAAAGCTATCCCACCAGGTTGCGGTGATGAACCGGAAGAAGAAGACGAAAGTATTCTGGATACTGTTATCAAATATCTACCCGGACCACTACAGGATATGTTTAAG…
50% optimized Cplx1	ATGGAATTCGTAATGAAACAGGCTCTGGGAGGGGCTACCAAAGACATGGGGAAAATGCTTGGGGGTGACGAAGAGAAAGACCCTGACGCTGCCAAAAAGGAAGAGGAACGGCAAGAGGCACTGCGACAGGCAGAGGAAGAGCGTAAGGCAAAGTATGCCAAAATGGAAGCGGAACGCGAAGTCATGCGGCAAGGCATAAGGGATAAGTATGGCATTAAGAAAAAGGAAGAGCGTGAGGCTGAGGCTCAGGCAGCCATGGAGGCTAACTCAGAGGGTAGCCTAACCCGACCCAAAAAGGCTATCCCACCGGGTTGCGGTGACGAACCGGAAGAGGAAGACGAAAGCATTCTGGATACCGTTATCAAATACCTACCCGGACCGCTACAGGATATGTTTAAG…
75% optimized Cplx1	ATGGAATTCGTGATGAAACAGGCCCTGGGAGGGGCCACCAAAGACATGGGGAAAATGCTCGGGGGTGACGAGGAGAAAGACCCCGACGCTGCCAAGAAGGAAGAGGAGCGGCAAGAGGCGCTGCGACAGGCGGAGGAAGAGCGCAAGGCAAAGTACGCCAAAATGGAGGCGGAACGCGAGGTCATGCGGCAGGGCATAAGGGACAAGTATGGCATCAAGAAAAAGGAGGAGCGTGAGGCCGAGGCTCAGGCGGCCATGGAGGCCAACTCAGAGGGCAGCCTAACCCGGCCCAAAAAGGCCATCCCACCGGGCTGCGGTGACGAGCCGGAAGAGGAGGACGAAAGCATCCTGGATACCGTCATCAAATACCTGCCCGGACCGCTGCAGGATATGTTCAAG…
100% optimized Cplx1	ATGGAGTTCGTGATGAAGCAGGCCCTGGGGGGGGCCACCAAGGACATGGGGAAGATGCTCGGGGGCGACGAGGAGAAGGACCCCGACGCCGCCAAGAAGGAGGAGGAGCGGCAGGAGGCGCTGCGGCAGGCGGAGGAGGAGCGCAAGGCGAAGTACGCCAAGATGGAGGCGGAGCGCGAGGTCATGCGGCAGGGCATCAGGGACAAGTACGGCATCAAGAAGAAGGAGGAGCGCGAGGCCGAGGCCCAGGCGGCCATGGAGGCCAACTCGGAGGGCAGCCTGACCCGGCCCAAGAAGGCCATCCCGCCGGGCTGCGGCGACGAGCCGGAGGAGGAGGACGAGAGCATCCTGGACACCGTCATCAAGTACCTGCCCGGGCCGCTGCAGGACATGTTCAAG…
0% optimized Cfl1	ATGGCTTCTGGTGTAGCTGTTTCTGATGGTGTTATTAAAGTATTTAATGATATGAAAGTTCGTAAATCTTCAACACCAGAAGAAGTAAAAAAACGTAAAAAAGCAGTACTTTTTTGTCTAAGTGAAGATAAAAAAAATATTATTCTAGAAGAAGGTAAAGAAATTCTAGTAGGAGATGTAGGACAAACTGTAGATGATCCTTATACTACTTTTGTTAAAATGCTACCAGATAAAGATTGTCGTTATGCACTTTATGATGCAACTTATGAAACTAAAGAAAGTAAAAAAGAAGATCTAGTATTTATTTTTTGGGCTCCTGAAAATGCACCTCTTAAAAGTAAAATGATTTATGCTAGTTCTAAAGATGCTATTAAAAAAAAACTAACAGGAATTAAACAT…
25% optimized Cfl1	ATGGCTTCTGGTGTGGCTGTTTCTGACGGTGTTATTAAGGTATTTAATGACATGAAAGTTCGCAAATCTTCAACGCCAGAAGAAGTGAAAAAACGTAAGAAAGCAGTACTCTTTTGTCTAAGCGAAGATAAAAAGAATATTATTCTGGAAGAAGGTAAGGAAATTCTAGTGGGAGATGTAGGGCAAACTGTAGACGATCCTTATACCACTTTTGTTAAGATGCTACCAGACAAAGATTGTCGCTATGCACTTTACGATGCAACTTACGAAACTAAAGAGAGTAAAAAAGAGGATCTAGTATTCATTTTTTGGGCCCCTGAAAATGCGCCTCTTAAAAGCAAAATGATTTACGCTAGTTCTAAGGATGCTATTAAGAAAAAACTAACGGGAATTAAACAC…
50% optimized Cfl1	ATGGCTTCCGGTGTGGCTGTCTCTGACGGTGTCATTAAGGTATTCAATGACATGAAGGTTCGCAAATCCTCAACGCCAGAGGAAGTGAAAAAGCGTAAGAAAGCGGTACTCTTTTGCCTAAGCGAAGACAAAAAGAATATCATTCTGGAAGAGGGTAAGGAAATCCTAGTGGGAGACGTAGGGCAAACCGTAGACGATCCCTATACCACTTTCGTTAAGATGCTGCCAGACAAAGACTGTCGCTATGCGCTTTACGATGCGACTTACGAAACCAAAGAGAGTAAGAAAGAGGATCTGGTATTCATTTTCTGGGCCCCTGAGAATGCGCCTCTCAAAAGCAAAATGATTTACGCTAGTTCTAAGGATGCCATTAAGAAAAAGCTAACGGGAATCAAACAC…
75% optimized Cfl1	ATGGCTTCCGGCGTGGCTGTCTCCGACGGTGTCATCAAGGTATTCAACGACATGAAGGTCCGCAAATCCTCGACGCCAGAGGAGGTGAAAAAGCGCAAGAAAGCGGTGCTCTTTTGCCTGAGCGAAGACAAGAAGAATATCATCCTGGAAGAGGGCAAGGAAATCCTGGTGGGAGACGTGGGGCAAACCGTGGACGATCCCTACACCACTTTCGTCAAGATGCTGCCGGACAAAGACTGCCGCTATGCGCTCTACGATGCGACCTACGAAACCAAGGAGAGTAAGAAGGAGGATCTGGTGTTCATTTTCTGGGCCCCTGAGAACGCGCCTCTCAAGAGCAAAATGATCTACGCTAGTTCCAAGGATGCCATCAAGAAAAAGCTGACGGGAATCAAGCAC…
100% optimized Cfl1	ATGGCCTCCGGCGTGGCCGTCTCCGACGGCGTCATCAAGGTGTTCAACGACATGAAGGTCCGCAAGTCCTCGACGCCGGAGGAGGTGAAGAAGCGCAAGAAGGCGGTGCTCTTCTGCCTGAGCGAGGACAAGAAGAACATCATCCTGGAGGAGGGCAAGGAGATCCTGGTGGGGGACGTGGGGCAGACCGTGGACGACCCCTACACCACCTTCGTCAAGATGCTGCCGGACAAGGACTGCCGCTACGCGCTCTACGACGCGACCTACGAGACCAAGGAGAGCAAGAAGGAGGACCTGGTGTTCATCTTCTGGGCCCCCGAGAACGCGCCCCTCAAGAGCAAGATGATCTACGCCAGCTCCAAGGACGCCATCAAGAAGAAGCTGACGGGGATCAAGCAC…
0% optimized Park7	ATGGCTTCTAAAAGAGCTCTAGTTATTCTAGCTAAAGGAGCAGAAGAAATGGAAACAGTAATTCCTGTAGATGTTATGCGACGAGCTGGAATTAAAGTTACTGTTGCAGGTTTAGCTGGAAAAGATCCTGTACAATGTAGTCGTGATGTAATGATTTGTCCAGATACTAGTCTAGAAGATGCAAAAACACAAGGACCATATGATGTAGTAGTTCTTCCAGGAGGAAATCTAGGTGCACAAAATTTATCTGAATCACCTATGGTAAAAGAAATTCTTAAAGAACAAGAAAGTAGAAAAGGTCTTATAGCTGCTATTTGTGCAGGTCCTACAGCTCTATTAGCTCATGAAGTAGGTTTTGGATGTAAAGTTACAACACATCCACTAGCTAAAGATAAAATG…
25% optimized Park7	ATGGCTTCTAAAAGGGCTCTAGTTATCCTAGCTAAAGGGGCAGAAGAAATGGAAACAGTAATCCCTGTAGATGTCATGCGACGAGCCGGAATTAAAGTCACTGTTGCAGGCTTAGCTGGAAAGGATCCTGTACAGTGTAGTCGTGACGTAATGATTTGCCCAGATACTAGCCTAGAAGATGCGAAAACACAAGGGCCATATGATGTGGTAGTTCTTCCGGGAGGAAATCTGGGTGCACAAAACTTATCTGAATCGCCTATGGTAAAGGAAATTCTTAAAGAACAAGAAAGCAGAAAAGGTCTCATAGCTGCTATCTGTGCAGGTCCCACAGCTCTATTGGCTCATGAAGTGGGTTTTGGATGCAAAGTTACAACGCATCCACTAGCCAAAGATAAAATG…
50% optimized Park7	ATGGCTTCCAAAAGGGCTCTGGTTATCCTAGCCAAAGGGGCAGAGGAAATGGAAACGGTAATCCCTGTGGATGTCATGCGGCGAGCCGGAATCAAAGTCACTGTCGCAGGCTTAGCCGGAAAGGATCCCGTACAGTGTAGCCGTGACGTAATGATTTGCCCAGACACTAGCCTAGAGGATGCGAAAACGCAAGGGCCATACGATGTGGTAGTCCTTCCGGGAGGGAATCTGGGTGCGCAAAACTTATCCGAATCGCCTATGGTAAAGGAAATCCTTAAAGAACAGGAAAGCAGAAAGGGTCTCATAGCCGCTATCTGTGCGGGTCCCACAGCCCTATTGGCTCACGAAGTGGGTTTCGGATGCAAAGTCACAACGCATCCACTAGCCAAAGACAAAATG…
75% optimized Park7	ATGGCTTCCAAGAGGGCTCTGGTCATCCTAGCCAAGGGGGCAGAGGAGATGGAAACGGTGATCCCTGTGGACGTCATGCGGCGGGCCGGAATCAAGGTCACTGTCGCGGGCTTAGCCGGGAAGGATCCCGTGCAGTGTAGCCGCGACGTAATGATCTGCCCAGACACCAGCCTAGAGGACGCGAAAACGCAGGGGCCATACGACGTGGTAGTCCTCCCGGGAGGGAACCTGGGTGCGCAGAACTTATCCGAGTCGCCTATGGTGAAGGAAATCCTCAAGGAACAGGAGAGCAGAAAGGGCCTCATAGCCGCCATCTGTGCGGGCCCCACAGCCCTGTTGGCTCACGAGGTGGGTTTCGGGTGCAAAGTCACGACGCATCCGCTGGCCAAAGACAAGATG…
100% optimized Park7	ATGGCCTCCAAGAGGGCCCTGGTCATCCTGGCCAAGGGGGCGGAGGAGATGGAGACGGTGATCCCCGTGGACGTCATGCGGCGGGCCGGGATCAAGGTCACCGTCGCGGGCTTGGCCGGGAAGGACCCCGTGCAGTGCAGCCGCGACGTGATGATCTGCCCGGACACCAGCCTGGAGGACGCGAAGACGCAGGGGCCGTACGACGTGGTGGTCCTCCCGGGGGGGAACCTGGGCGCGCAGAACTTGTCCGAGTCGCCCATGGTGAAGGAGATCCTCAAGGAGCAGGAGAGCAGGAAGGGCCTCATCGCCGCCATCTGCGCGGGCCCCACGGCCCTGTTGGCCCACGAGGTGGGCTTCGGGTGCAAGGTCACGACGCACCCGCTGGCCAAGGACAAGATG…
0% optimized Rab5a	ATGGCTAATCGAGGAGCAACAAGACCTAATGGACCAAATACTGGAAATAAAATATGTCAATTTAAACTAGTTCTTCTAGGAGAATCTGCTGTTGGTAAATCAAGTCTAGTTCTTCGTTTTGTAAAAGGTCAATTTCATGAATTTCAAGAAAGTACTATTGGAGCTGCTTTTCTAACTCAAACTGTATGTCTTGATGATACAACAGTAAAATTTGAAATATGGGATACAGCTGGTCAAGAACGATATCATAGTTTAGCACCAATGTATTATCGAGGAGCACAAGCAGCTATAGTTGTATATGATATTACAAATGAAGAATCTTTTGCAAGAGCAAAAAATTGGGTTAAAGAACTTCAAAGACAAGCAAGTCCTAATATTGTAATAGCTTTATCAGGAAAT…
25% optimized Rab5a	ATGGCTAATCGAGGGGCAACAAGACCCAATGGACCAAACACTGGAAATAAGATATGTCAATTCAAACTAGTTCTCCTAGGAGAATCCGCTGTTGGTAAGTCAAGTCTAGTCCTTCGTTTTGTGAAAGGTCAATTCCATGAATTTCAGGAAAGTACTATCGGAGCTGCTTTCCTAACTCAAACCGTATGTCTTGACGATACAACAGTGAAATTTGAAATCTGGGATACAGCCGGTCAAGAACGGTATCATAGTTTGGCACCAATGTACTATCGAGGAGCGCAAGCAGCTATCGTTGTATATGACATTACAAATGAGGAATCTTTTGCGAGAGCAAAAAACTGGGTTAAAGAGCTTCAAAGACAGGCAAGTCCTAACATTGTAATAGCCTTATCAGGAAAC…
50% optimized Rab5a	ATGGCTAACCGAGGGGCAACGAGACCCAATGGGCCAAACACTGGGAATAAGATATGCCAATTCAAACTGGTTCTCCTAGGGGAATCCGCTGTCGGTAAGTCAAGCCTAGTCCTTCGCTTTGTGAAAGGCCAATTCCATGAGTTTCAGGAAAGCACTATCGGAGCCGCTTTCCTAACCCAAACCGTATGCCTTGACGATACGACAGTGAAATTCGAAATCTGGGACACAGCCGGTCAGGAACGGTATCACAGTTTGGCACCGATGTACTATCGGGGAGCGCAAGCGGCTATCGTTGTGTATGACATTACGAATGAGGAATCCTTTGCGAGAGCGAAAAACTGGGTCAAAGAGCTTCAGAGACAGGCAAGCCCTAACATTGTGATAGCCTTATCGGGAAAC…
75% optimized Rab5a	ATGGCTAACCGGGGGGCAACGAGGCCCAATGGGCCGAACACTGGGAACAAGATATGCCAGTTCAAACTGGTCCTCCTAGGGGAGTCCGCTGTCGGCAAGTCAAGCCTGGTCCTTCGCTTCGTGAAAGGCCAGTTCCATGAGTTCCAGGAAAGCACCATCGGAGCCGCCTTCCTAACCCAGACCGTATGCCTCGACGATACGACGGTGAAATTCGAGATCTGGGACACGGCCGGTCAGGAGCGGTATCACAGCTTGGCACCGATGTACTATCGGGGGGCGCAAGCGGCCATCGTTGTGTACGACATTACGAACGAGGAATCCTTCGCGAGAGCGAAGAACTGGGTCAAGGAGCTTCAGAGGCAGGCAAGCCCCAACATTGTGATCGCCTTATCGGGGAAC…
100% optimized Rab5a	ATGGCCAACCGGGGGGCGACGAGGCCCAACGGGCCGAACACCGGGAACAAGATCTGCCAGTTCAAGCTGGTCCTCCTGGGGGAGTCCGCCGTCGGCAAGTCGAGCCTGGTCCTCCGCTTCGTGAAGGGCCAGTTCCACGAGTTCCAGGAGAGCACCATCGGGGCCGCCTTCCTGACCCAGACCGTGTGCCTCGACGACACGACGGTGAAGTTCGAGATCTGGGACACGGCCGGCCAGGAGCGGTACCACAGCTTGGCGCCGATGTACTACCGGGGGGCGCAGGCGGCCATCGTCGTGTACGACATCACGAACGAGGAGTCCTTCGCGAGGGCGAAGAACTGGGTCAAGGAGCTCCAGAGGCAGGCGAGCCCCAACATCGTGATCGCCTTGTCGGGGAAC…
